# Supplementary material for: Antiproliferative Activity and Impact on Human Gut Microbiota of New O-Alkyl Derivatives of Naringenin and Their Oximes
Source: MDPI journal article supplement (doi:10.3390/ijms24129856), 2023-06-07
Supplement: s1 [file s1]

# Antiproliferative Activity and Impact on Human Gut Microbiota of New *O*-Alkyl Derivatives of Naringenin and Their Oximes

Joanna Kozłowska <sup>1,\*</sup>, Anna Duda-Madej <sup>2</sup> and Dagmara Baczyńska <sup>3</sup>

Figure S1. <sup>1</sup>H NMR (600 MHz, chloroform-*d*) spectrum of 7-*O*-heptylnaringenin (**A3**)

Figure S2. <sup>13</sup>C NMR (150 MHz, chloroform-*d*) spectrum of 7-*O*-heptylnaringenin (**A3**)

Figure S3. COSY NMR (150 MHz, chloroform-*d*) spectrum of 7-*O*-heptylnaringenin (**A3**)

Figure S4. HSQC NMR (150 MHz, chloroform-*d*) spectrum of 7-*O*-heptylnaringenin (**A3**)

Figure S5. <sup>1</sup>H NMR (600 MHz, chloroform-*d*) spectrum of 7,4'-di-*O*-heptylnaringenin (**A4**)

Figure S6. <sup>13</sup>C NMR (150 MHz, chloroform-*d*) spectrum of 7,4'-di-*O*-heptylnaringenin (**A4**)

Figure S7. COSY NMR (150 MHz, chloroform-*d*) spectrum of 7,4'-di-*O*-heptylnaringenin (**A4**)

Figure S8. HSQC NMR (150 MHz, chloroform-*d*) spectrum of 7,4'-di-*O*-heptylnaringenin (**A4**)

Figure S9. <sup>1</sup>H NMR (600 MHz, chloroform-*d*) spectrum of 7-*O*-octylnaringenin (**A5**)

Figure S10. <sup>13</sup>C NMR (150 MHz, chloroform-*d*) spectrum of 7-*O*-octylnaringenin (**A5**)

Figure S11. COSY NMR (150 MHz, chloroform-*d*) spectrum of 7-*O*-octylnaringenin (**A5**)

Figure S12. HSQC NMR (150 MHz, chloroform-*d*) spectrum of 7-*O*-octylnaringenin (**A5**)

Figure S13. <sup>1</sup>H NMR (600 MHz, chloroform-*d*) spectrum of 7,4'-di-*O*-octylnaringenin (**A6**)

Figure S14. <sup>13</sup>C NMR (150 MHz, chloroform-*d*) spectrum of 7,4'-di-*O*-octylnaringenin (**A6**)

Figure S15. COSY NMR (150 MHz, chloroform-*d*) spectrum of 7,4'-di-*O*-octylnaringenin (**A6**)

Figure S16. HSQC NMR (150 MHz, chloroform-*d*) spectrum of 7,4'-di-*O*-octylnaringenin (**A6**)

Figure S17. <sup>1</sup>H NMR (600 MHz, chloroform-*d*) spectrum of 7-*O*-nonylnaringenin (**A7**)

Figure S18. <sup>13</sup>C NMR (150 MHz, chloroform-*d*) spectrum of 7-*O*-nonylnaringenin (**A7**)

Figure S19. COSY NMR (150 MHz, chloroform-*d*) spectrum of 7-*O*-nonylnaringenin (**A7**)

Figure S20. HSQC NMR (150 MHz, chloroform-*d*) spectrum of 7-*O*-nonylnaringenin (**A7**)

Figure S21. <sup>1</sup>H NMR (600 MHz, chloroform-*d*) spectrum of 7,4'-di-*O*-nonylnaringenin (**A8**)

Figure S22. <sup>13</sup>C NMR (150 MHz, chloroform-*d*) spectrum of 7,4'-di-*O*-nonylnaringenin (**A8**)

Figure S23. COSY NMR (150 MHz, chloroform-*d*) spectrum of 7,4'-di-*O*-nonylnaringenin (**A8**)

Figure S24. HSQC NMR (150 MHz, chloroform-*d*) spectrum of 7,4'-di-*O*-nonylnaringenin (**A8**)

Figure S25. <sup>1</sup>H NMR (600 MHz, chloroform-*d*) spectrum of 7-*O*-undecylnaringenin (**A9**)

Figure S26. <sup>13</sup>C NMR (150 MHz, chloroform-*d*) spectrum of 7-*O*-undecylnaringenin (**A9**)

Figure S27. COSY NMR (150 MHz, chloroform-*d*) spectrum of 7-*O*-undecylnaringenin (**A9**)

Figure S28. HSQC NMR (150 MHz, chloroform-*d*) spectrum of 7-*O*-undecylnaringenin (**A9**)

Figure S29. <sup>1</sup>H NMR (600 MHz, chloroform-*d*) spectrum of 7,4'-di-*O*-undecylnaringenin (**A10**)

Figure S30. <sup>13</sup>C NMR (150 MHz, chloroform-*d*) spectrum of 7,4'-di-*O*-undecylnaringenin (**A10**)

Figure S31. COSY NMR (150 MHz, chloroform-*d*) spectrum of 7,4'-di-*O*-undecylnaringenin (**A10**)

Figure S32. HSQC NMR (150 MHz, chloroform-*d*) spectrum of 7,4'-di-*O*-undecylnaringenin (**A10**)

Figure S33. <sup>1</sup>H NMR (600 MHz, acetone-*d*<sub>6</sub>) spectrum of 7-*O*-heptylnaringenin oxime (**B3**)

Figure S34. <sup>13</sup>C NMR (150 MHz, acetone-*d*<sub>6</sub>) spectrum of 7-*O*-heptylnaringenin oxime (**B3**)

Figure S35. COSY NMR (150 MHz, acetone-*d*<sub>6</sub>) spectrum of 7-*O*-heptylnaringenin oxime (**B3**)

Figure S36. HSQC NMR (150 MHz, acetone-*d*<sub>6</sub>) spectrum of 7-*O*-heptylnaringenin oxime (**B3**)

Figure S37. <sup>1</sup>H NMR (600 MHz, acetone-*d*<sub>6</sub>) spectrum of 7,4'-di-*O*-heptylnaringenin oxime (**B4**)

Figure S38. <sup>13</sup>C NMR (150 MHz, acetone-*d*<sub>6</sub>) spectrum of 7,4'-di-*O*-heptylnaringenin oxime (**B4**)

Figure S39. COSY NMR (150 MHz, acetone-*d*<sub>6</sub>) spectrum of 7,4'-di-*O*-heptylnaringenin oxime (**B4**)

Figure S40. HSQC NMR (150 MHz, acetone-*d*<sub>6</sub>) spectrum of 7,4'-di-*O*-heptylnaringenin oxime (**B4**)

Figure S41. <sup>1</sup>H NMR (600 MHz, acetone-*d*<sub>6</sub>) spectrum of 7-*O*-octylnaringenin oxime (**B5**)

Figure S42. <sup>13</sup>C NMR (150 MHz, acetone-*d*<sub>6</sub>) spectrum of 7-*O*-octylnaringenin oxime (**B5**)

Figure S43. COSY NMR (150 MHz, acetone-*d*<sub>6</sub>) spectrum of 7-*O*-octylnaringenin oxime (**B5**)

Figure S44. HSQC NMR (150 MHz, acetone-*d*<sub>6</sub>) spectrum of 7-*O*-octylnaringenin oxime (**B5**)

Figure S45. <sup>1</sup>H NMR (600 MHz, acetone-*d*<sub>6</sub>) spectrum of 7,4'-di-*O*-octylnaringenin oxime (**B6**)

Figure S46. <sup>13</sup>C NMR (150 MHz, acetone-*d*<sub>6</sub>) spectrum of 7,4'-di-*O*-octylnaringenin oxime (**B6**)

Figure S47. COSY NMR (150 MHz, acetone-*d*<sub>6</sub>) spectrum of 7,4'-di-*O*-octylnaringenin oxime (**B6**)

Figure S48. HSQC NMR (150 MHz, acetone-*d*<sub>6</sub>) spectrum of 7,4'-di-*O*-octylnaringenin oxime (**B6**)

Figure S49. <sup>1</sup>H NMR (600 MHz, acetone-*d*<sub>6</sub>) spectrum of 7-*O*-nonylnaringenin oxime (**B7**)

Figure S50. <sup>13</sup>C NMR (150 MHz, acetone-*d*<sub>6</sub>) spectrum of 7-*O*-nonylnaringenin oxime (**B7**)

Figure S51. COSY NMR (150 MHz, acetone-*d*<sub>6</sub>) spectrum of 7-*O*-nonylnaringenin oxime (**B7**)

Figure S52. HSQC NMR (150 MHz, acetone-*d*<sub>6</sub>) spectrum of 7-*O*-nonylnaringenin oxime (**B7**)

Figure S53. <sup>1</sup>H NMR (600 MHz, acetone-*d*<sub>6</sub>) spectrum of 7,4'-di-*O*-nonylnaringenin oxime (**B8**)

Figure S54. <sup>13</sup>C NMR (150 MHz, acetone-*d*<sub>6</sub>) spectrum of 7,4'-di-*O*-nonylnaringenin oxime (**B8**)

Figure S55. COSY NMR (150 MHz, acetone-*d*<sub>6</sub>) spectrum of 7,4'-di-*O*-nonylnaringenin oxime (**B8**)

Figure S56. HSQC NMR (150 MHz, acetone-*d*<sub>6</sub>) spectrum of 7,4'-di-*O*-nonylnaringenin oxime (**B8**)

Figure S57. <sup>1</sup>H NMR (600 MHz, acetone-*d*<sub>6</sub>) spectrum of 7-*O*-undecylnaringenin oxime (**B9**)

Figure S58.  $^{13}\text{C}$  NMR (150 MHz, acetone- $d_6$ ) spectrum of 7-*O*-undecylnaringenin oxime (**B9**)

Figure S59. COSY NMR (150 MHz, acetone- $d_6$ ) spectrum of 7-*O*-undecylnaringenin oxime (**B9**)

Figure S60. HSQC NMR (150 MHz, acetone- $d_6$ ) spectrum of 7-*O*-undecylnaringenin oxime (**B9**)

Figure S61.  $^1\text{H}$  NMR (600 MHz, acetone- $d_6$ ) spectrum of 7,4'-di-*O*-undecylnaringenin oxime (**B10**)

Figure S62.  $^{13}\text{C}$  NMR (150 MHz, acetone- $d_6$ ) spectrum of 7,4'-di-*O*-undecylnaringenin oxime (**B10**)

Figure S63. COSY NMR (150 MHz, acetone- $d_6$ ) spectrum of 7,4'-di-*O*-undecylnaringenin oxime (**B10**)

Figure S64. HSQC NMR (150 MHz, acetone- $d_6$ ) spectrum of 7,4'-di-*O*-undecylnaringenin oxime (**B10**)

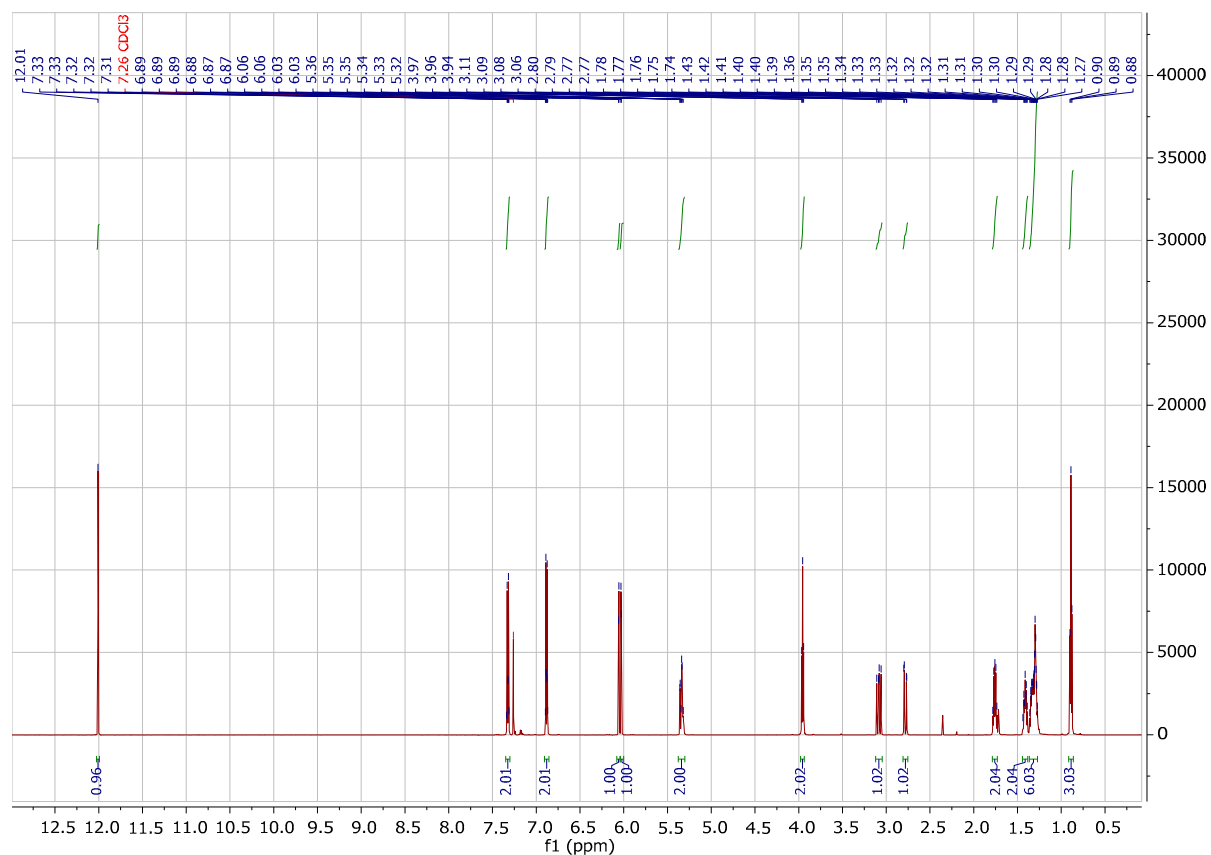

Figure S1.  $^1\text{H}$  NMR (600 MHz, chloroform- $d$ ) spectrum of 7-*O*-heptylnaringenin (**A3**)

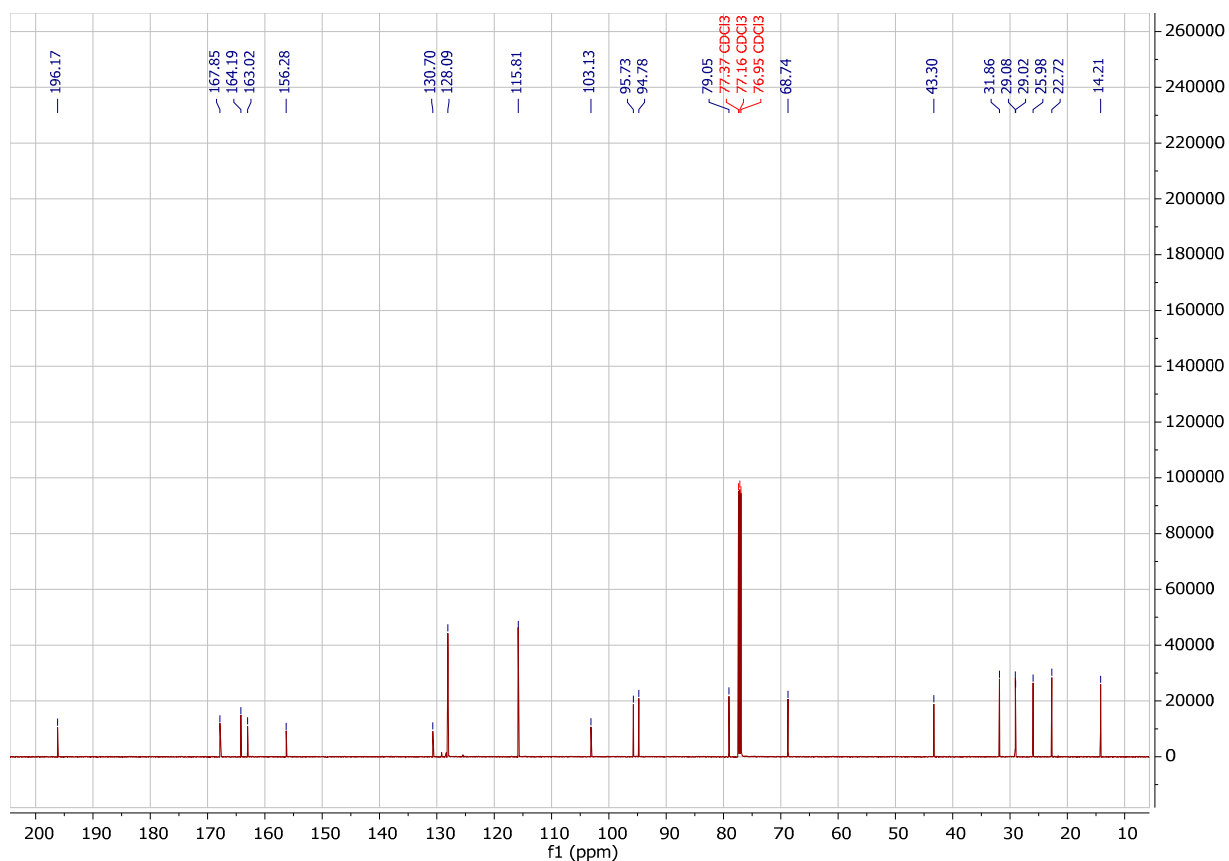

Figure S2. <sup>13</sup>C NMR (150 MHz, chloroform-*d*) spectrum of 7-*O*-heptylnaringenin (A3)

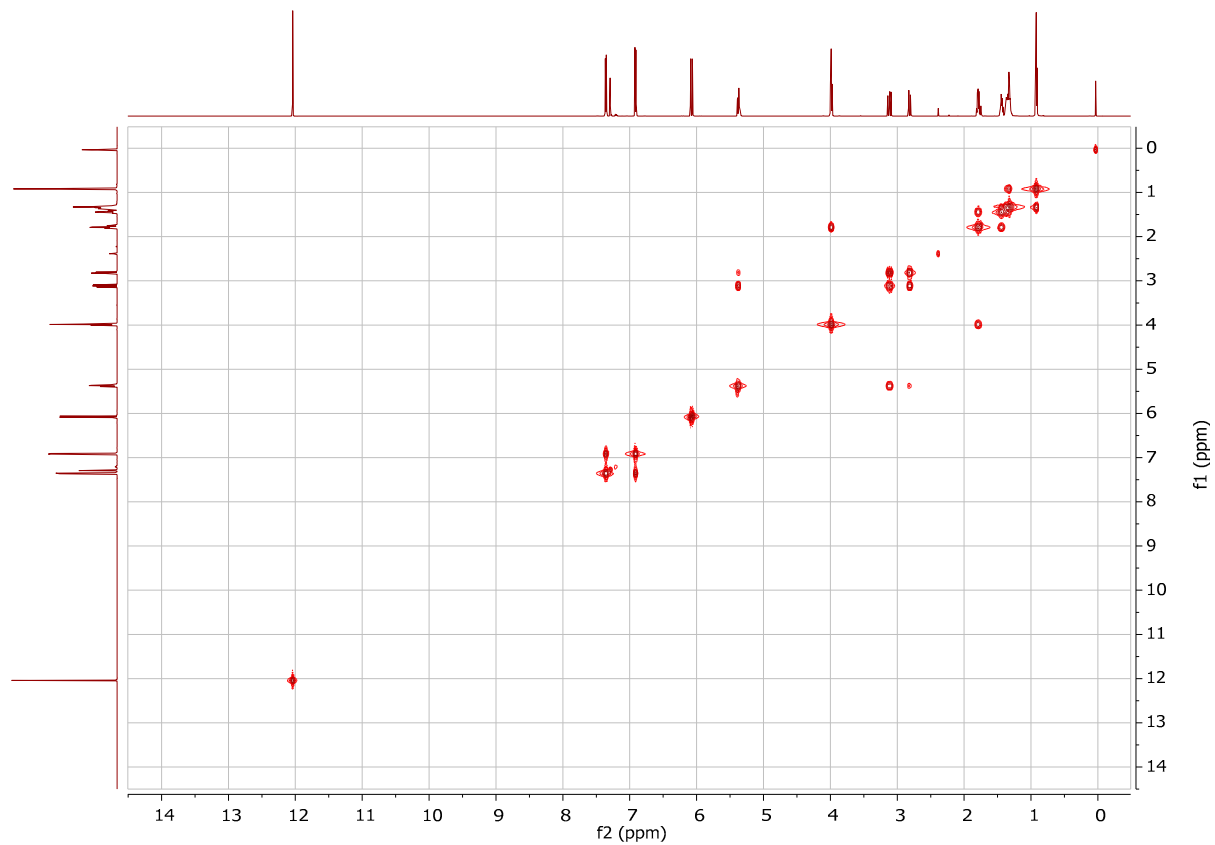

Figure S3. COSY NMR (150 MHz, chloroform-*d*) spectrum of 7-*O*-heptylnaringenin (A3)

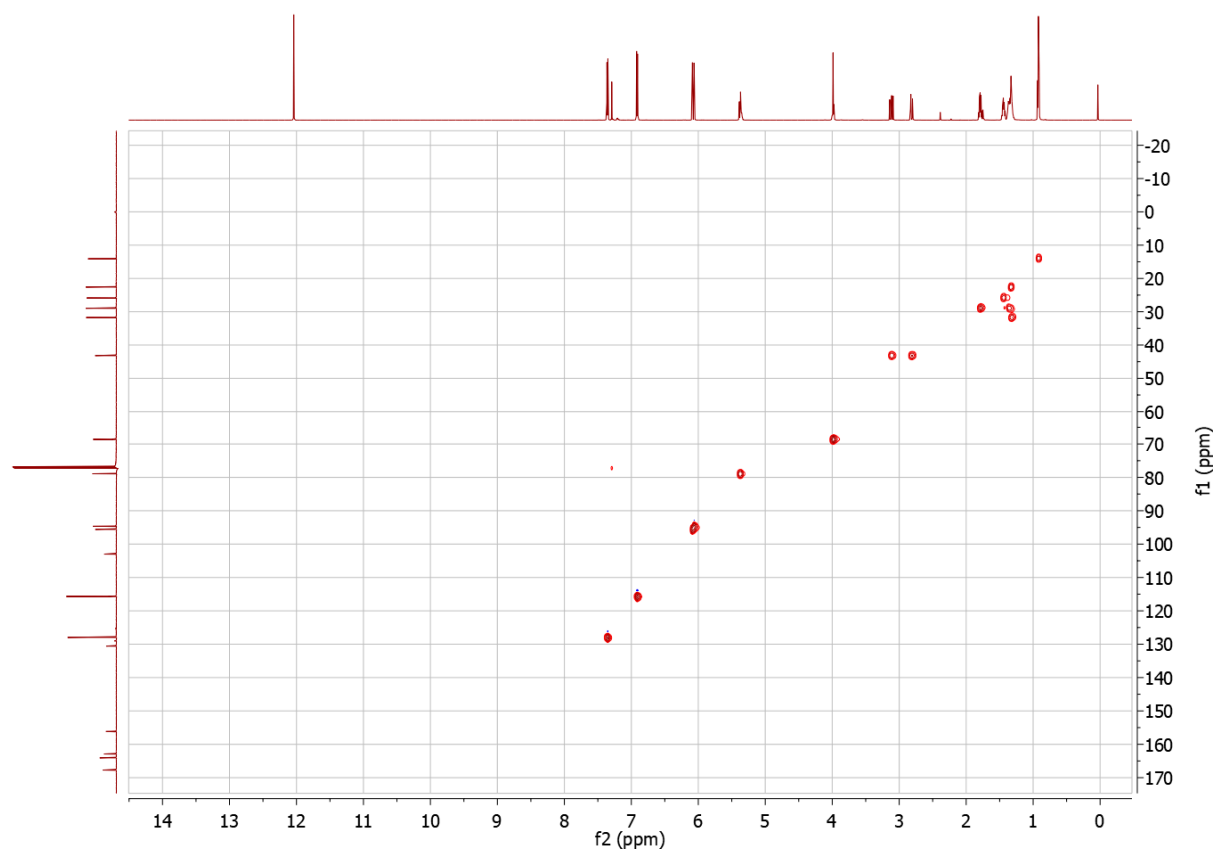

Figure S4. HSQC NMR (150 MHz, chloroform-*d*) spectrum of 7-*O*-heptylnaringenin (**A3**)

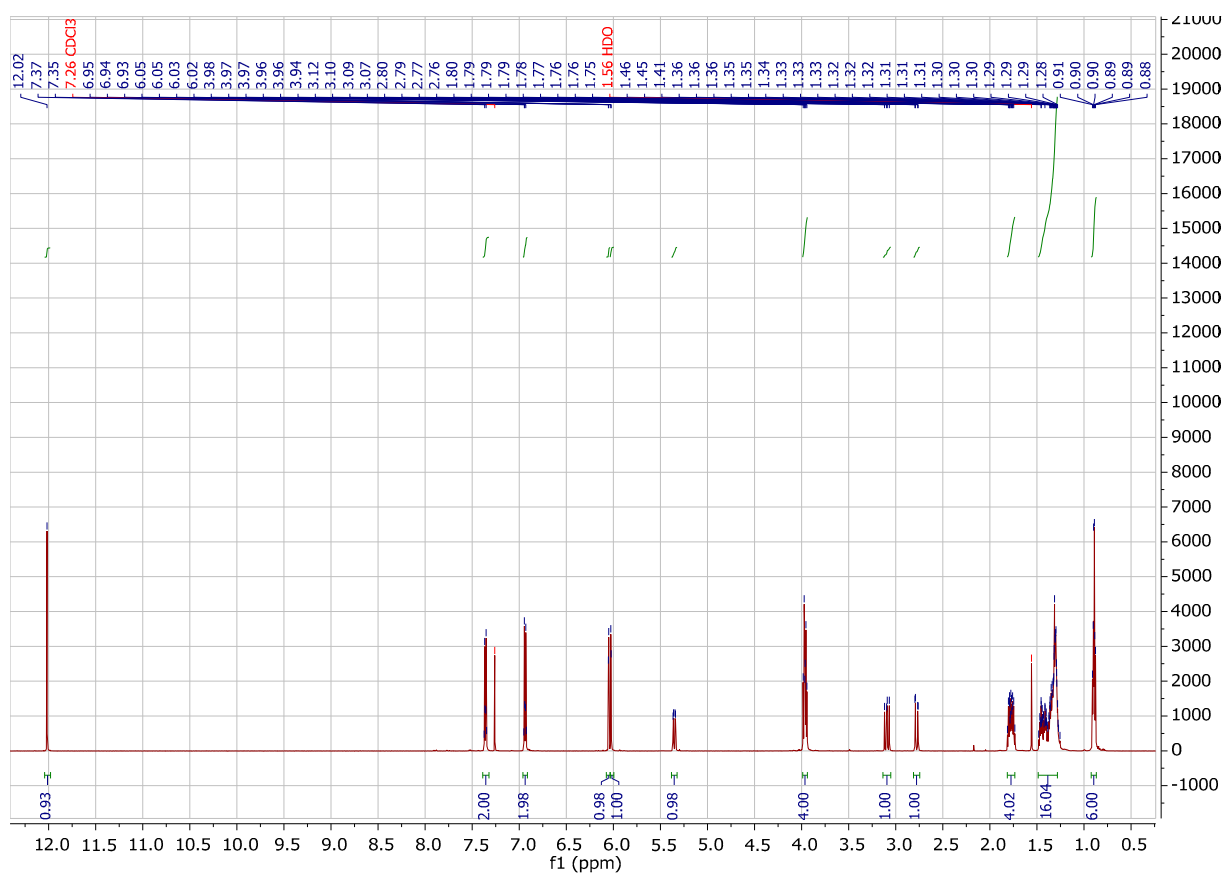

Figure S5.  $^1\text{H}$  NMR (600 MHz, chloroform-*d*) spectrum of 7,4'-di-*O*-heptylnaringenin (**A4**)

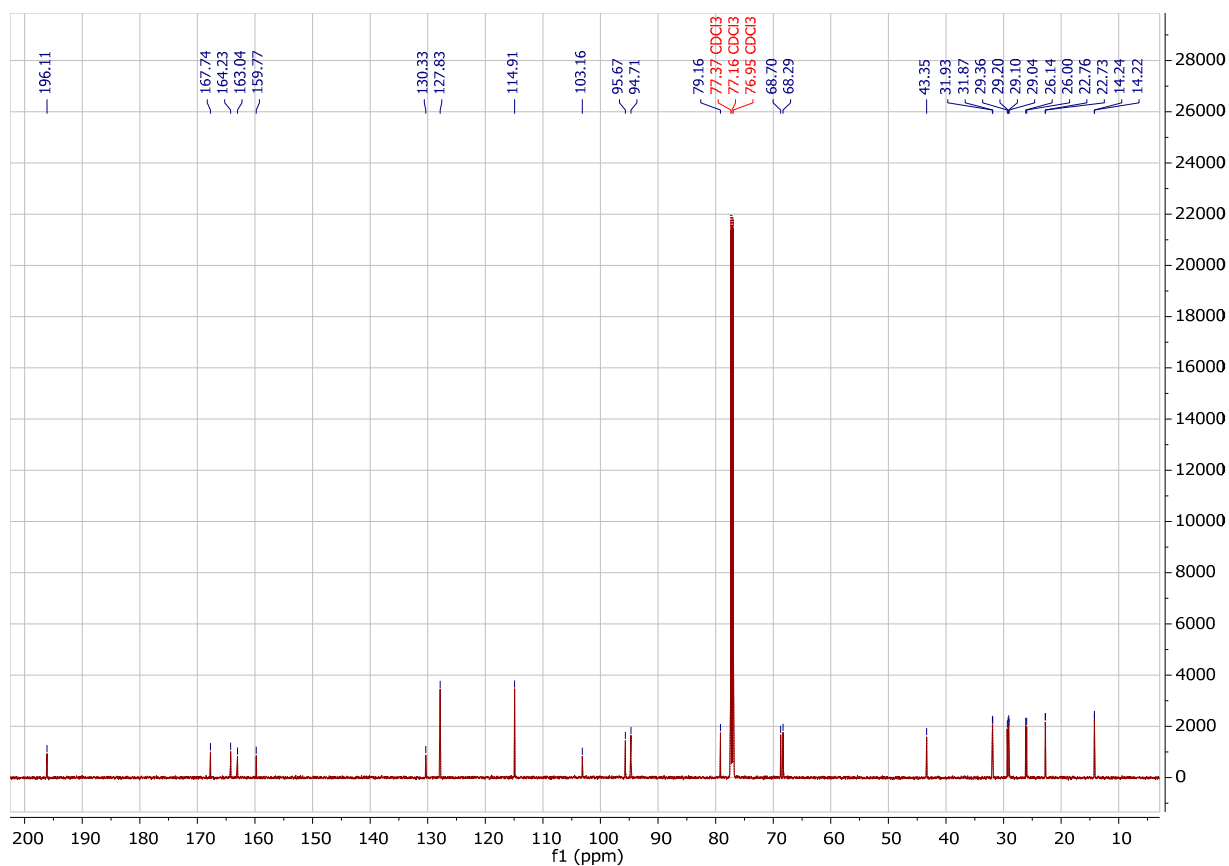

Figure S6.  $^{13}\text{C}$  NMR (150 MHz, chloroform- $d$ ) spectrum of 7,4'-di- $O$ -heptylnaringenin (**A4**)

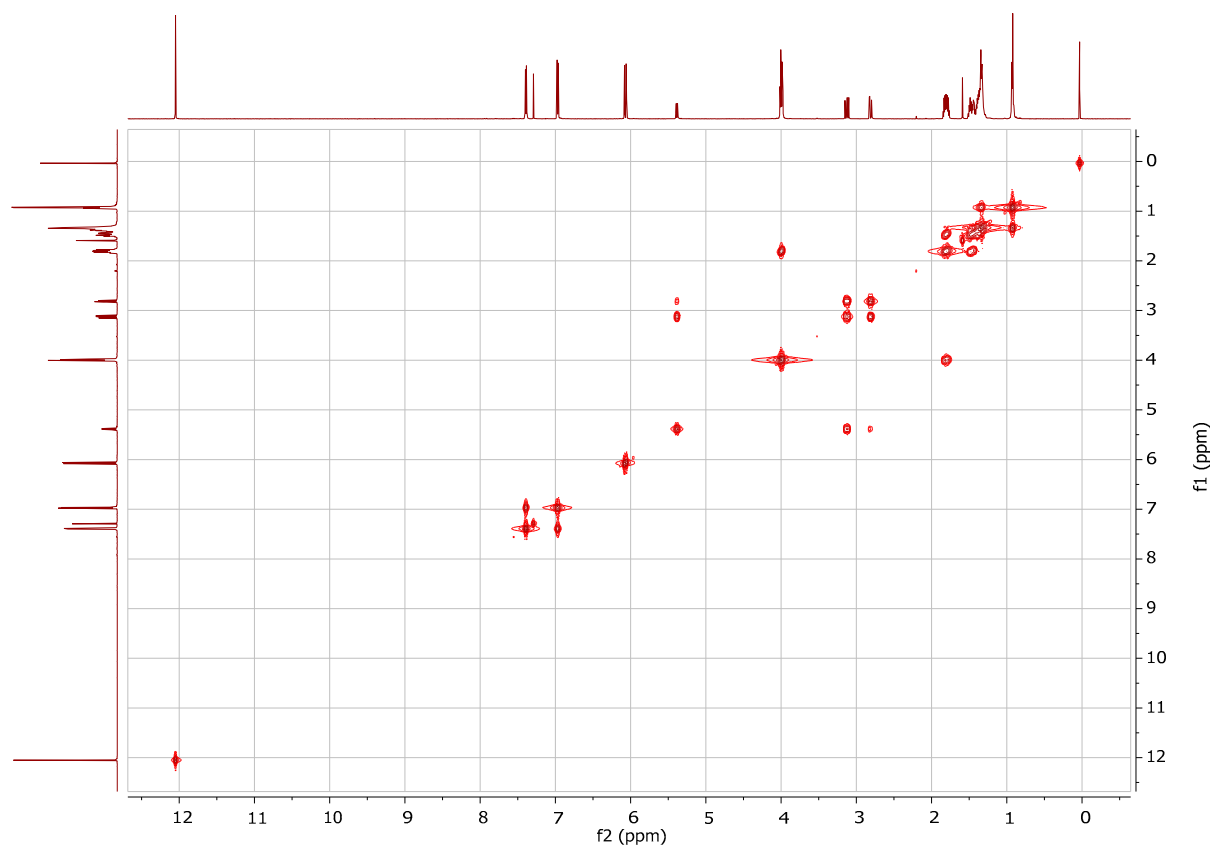

Figure S7. COSY NMR (150 MHz, chloroform- $d$ ) spectrum of 7,4'-di- $O$ -heptylnaringenin (**A4**)

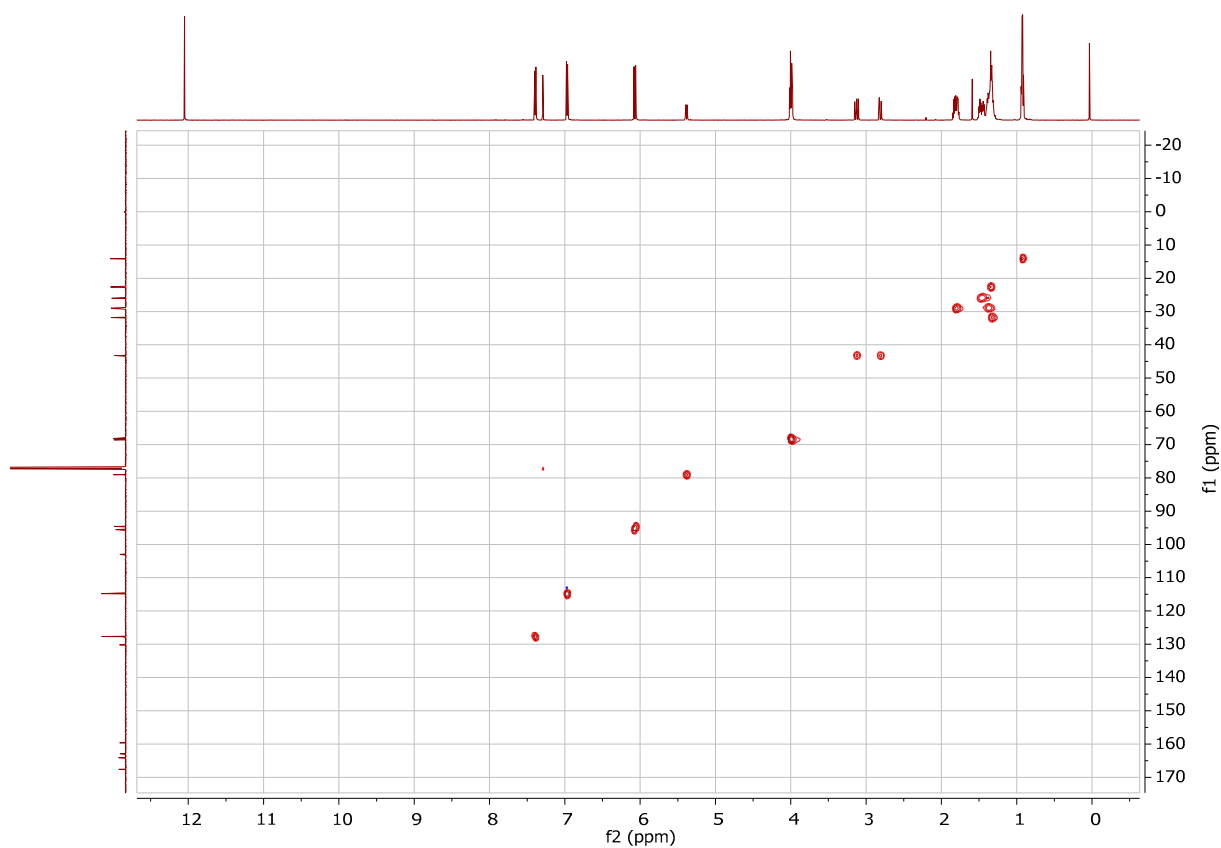

Figure S8. HSQC NMR (150 MHz, chloroform-*d*) spectrum of 7,4'-di-*O*-heptylnaringenin (A4)

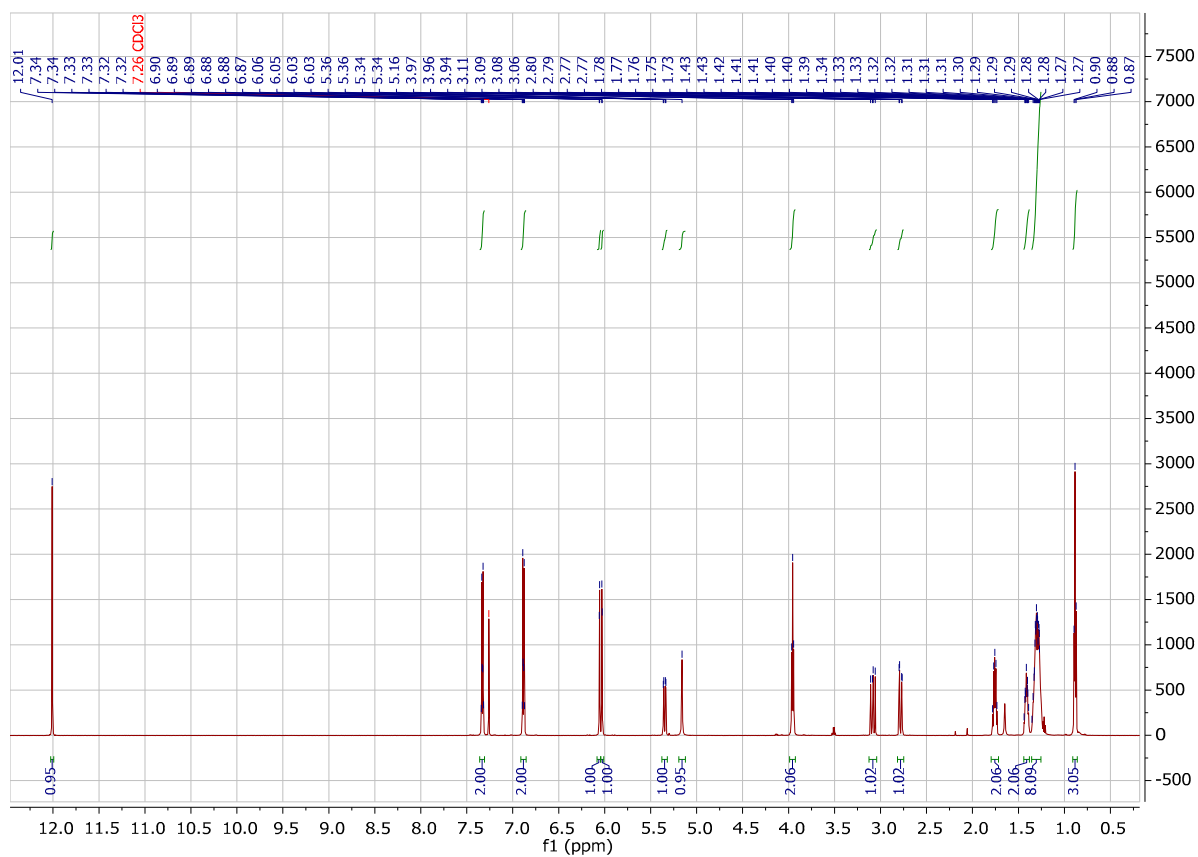

Figure S9. <sup>1</sup>H NMR (600 MHz, chloroform-*d*) spectrum of 7-*O*-octylnaringenin (A5)

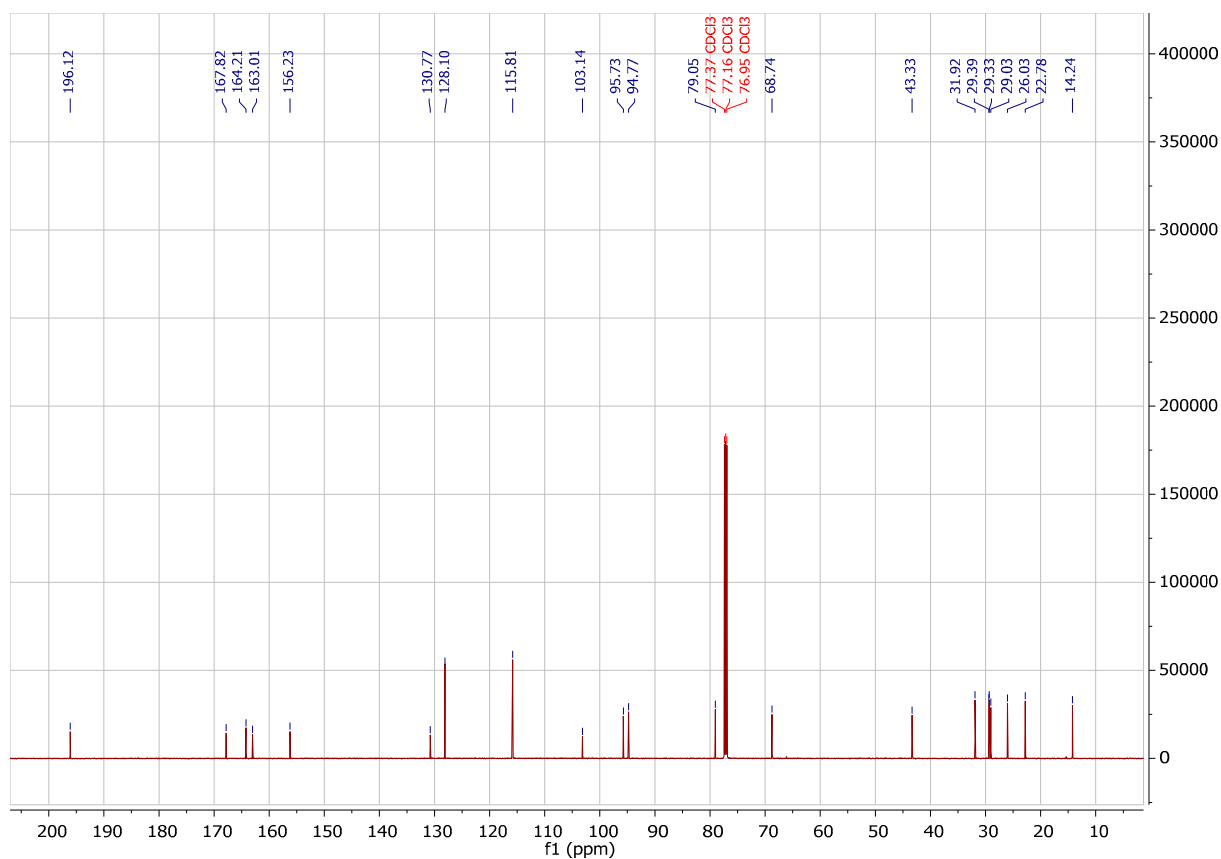

Figure S10. <sup>13</sup>C NMR (150 MHz, chloroform-*d*) spectrum of 7-*O*-octylningerin (**A5**)

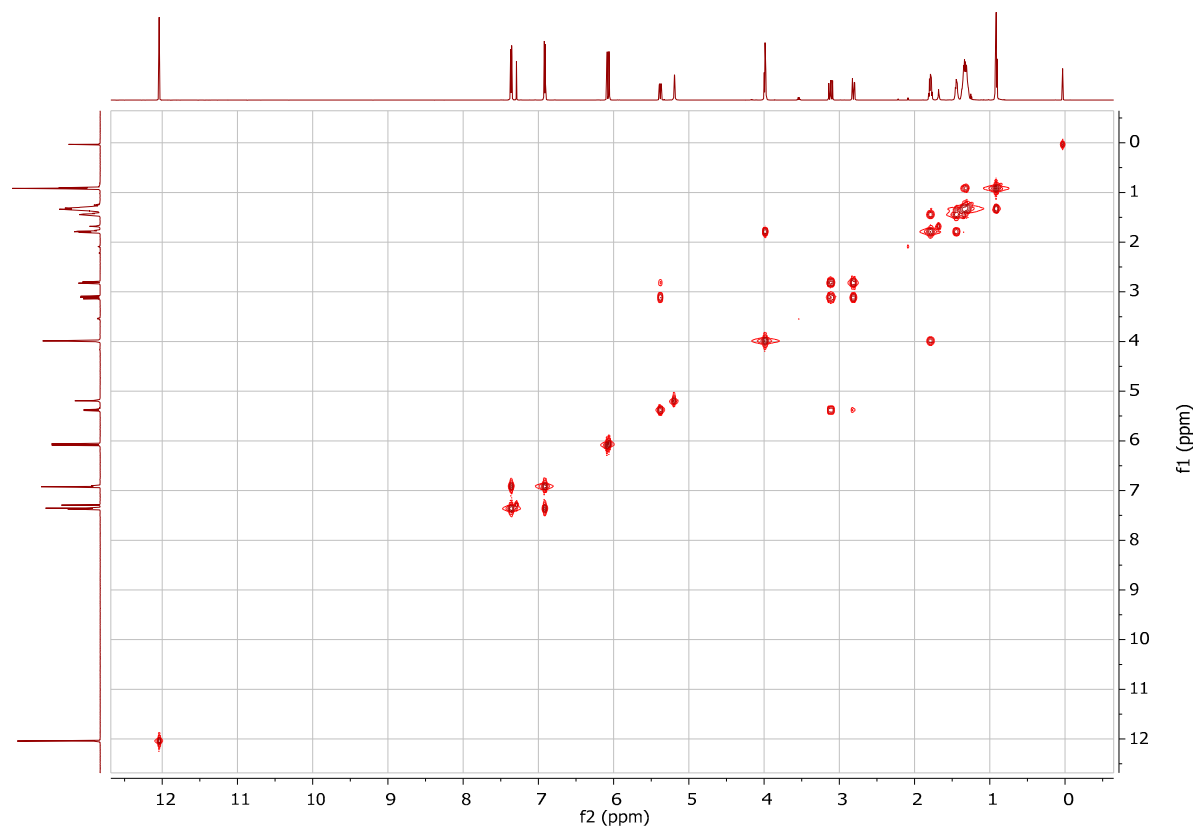

Figure S11. COSY NMR (150 MHz, chloroform-*d*) spectrum of 7-*O*-octylningerin (**A5**)





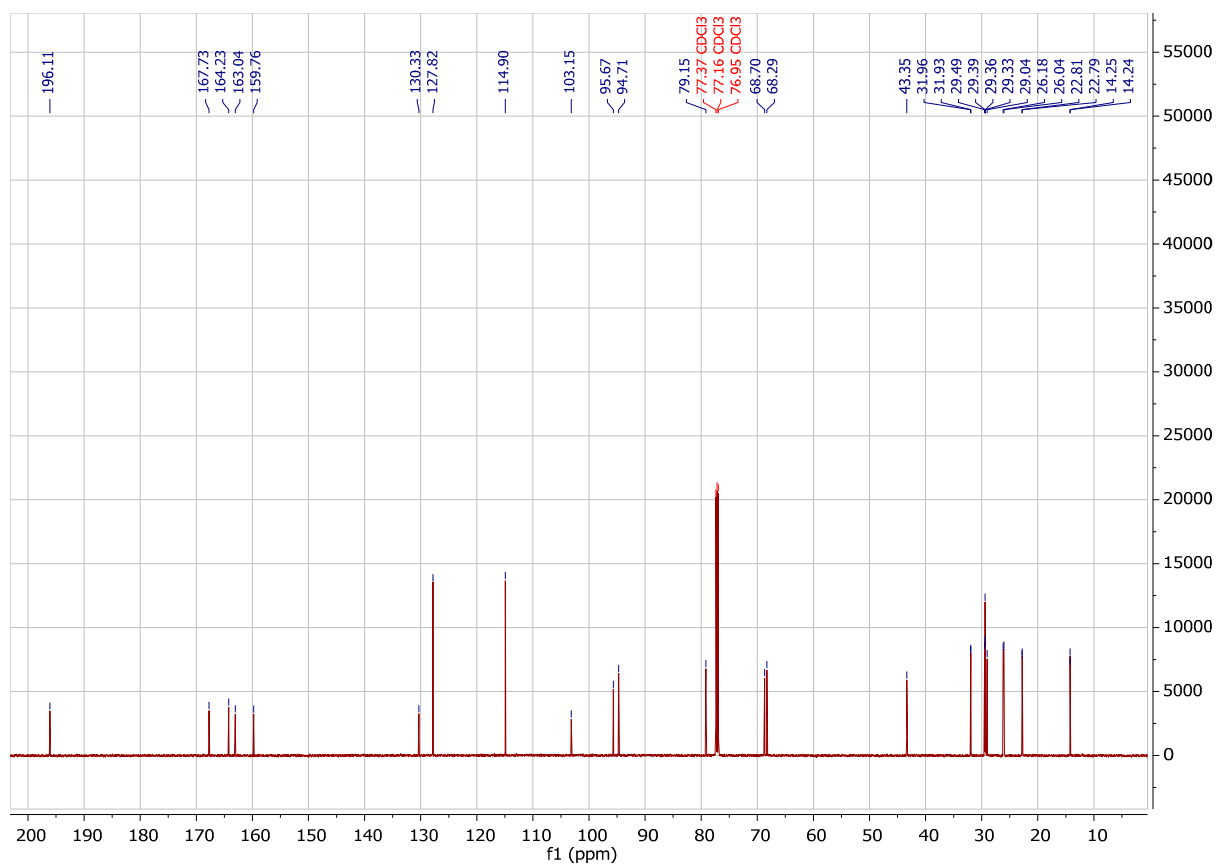

Figure S14.  $^{13}\text{C}$  NMR (150 MHz, chloroform-*d*) spectrum of 7,4'-di-*O*-octylharingenin (**A6**)

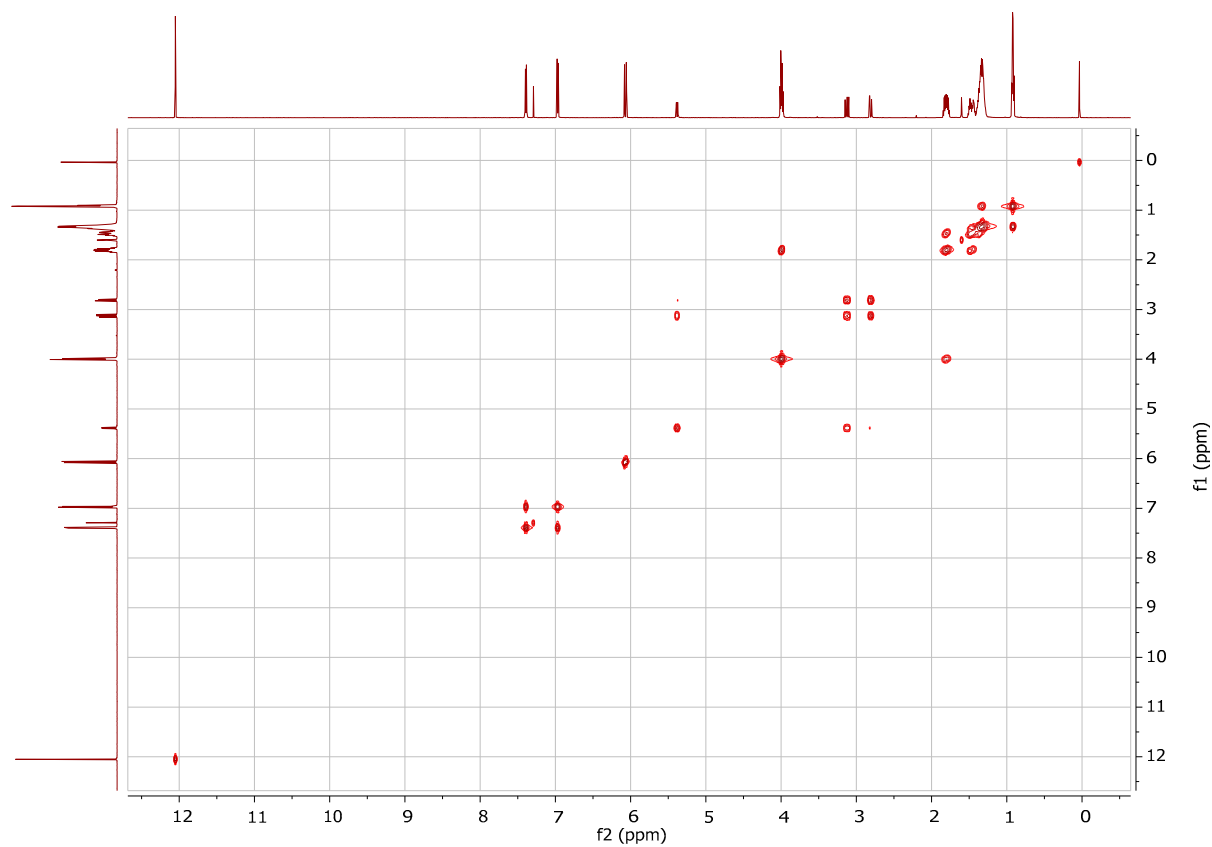

Figure S15. COSY NMR (150 MHz, chloroform-*d*) spectrum of 7,4'-di-*O*-octylharingenin (**A6**)

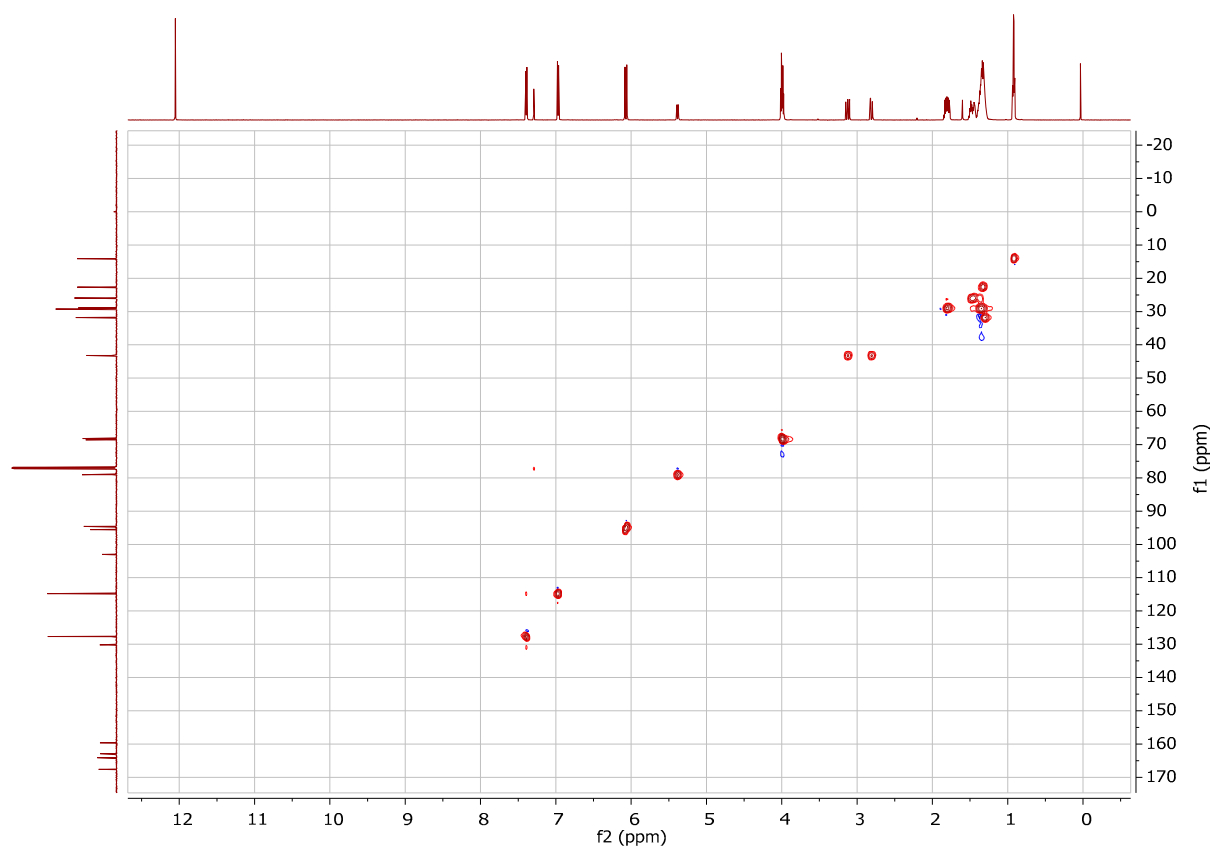

Figure S16. HSQC NMR (150 MHz, chloroform-*d*) spectrum of 7,4'-di-O-octylningerin (**A6**)

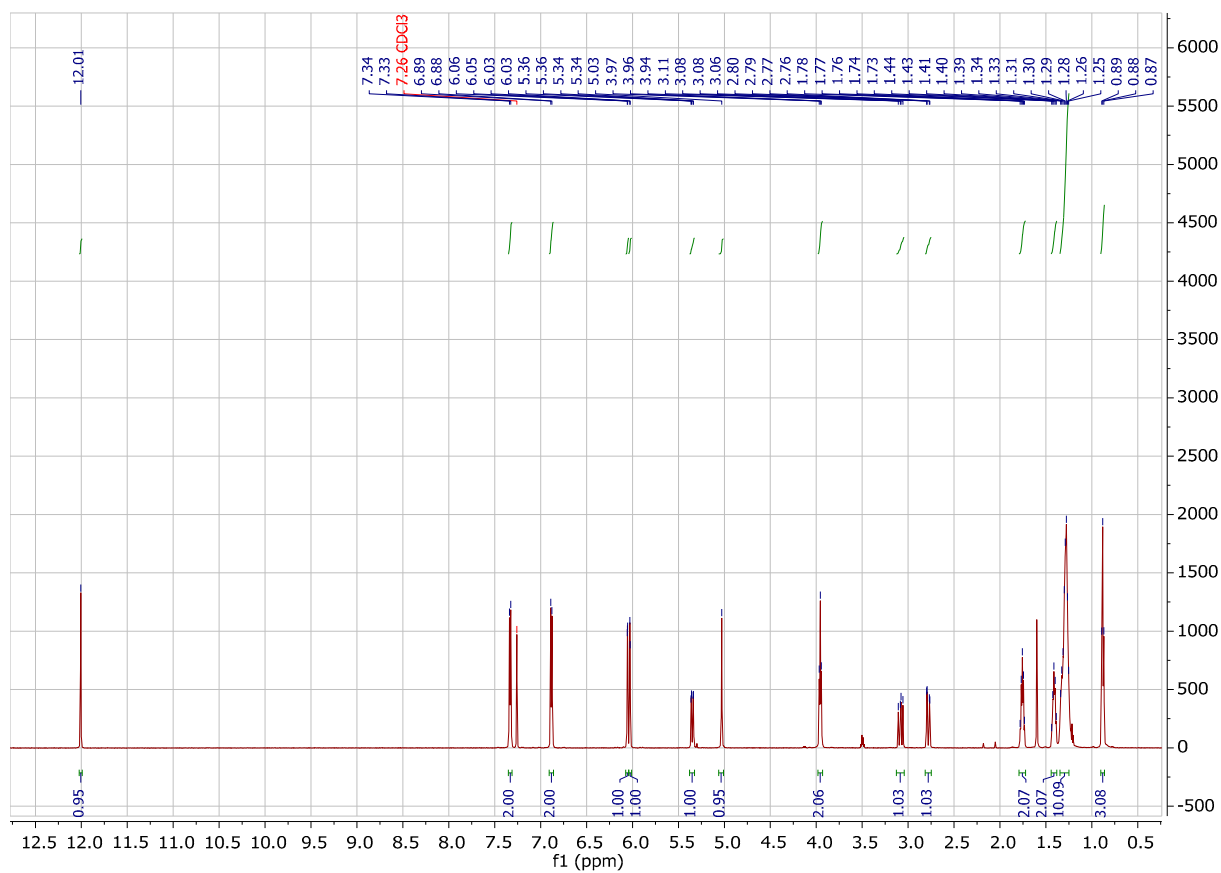

Figure S17. <sup>1</sup>H NMR (600 MHz, chloroform-*d*) spectrum of 7-O-nonylnaringenin (**A7**)

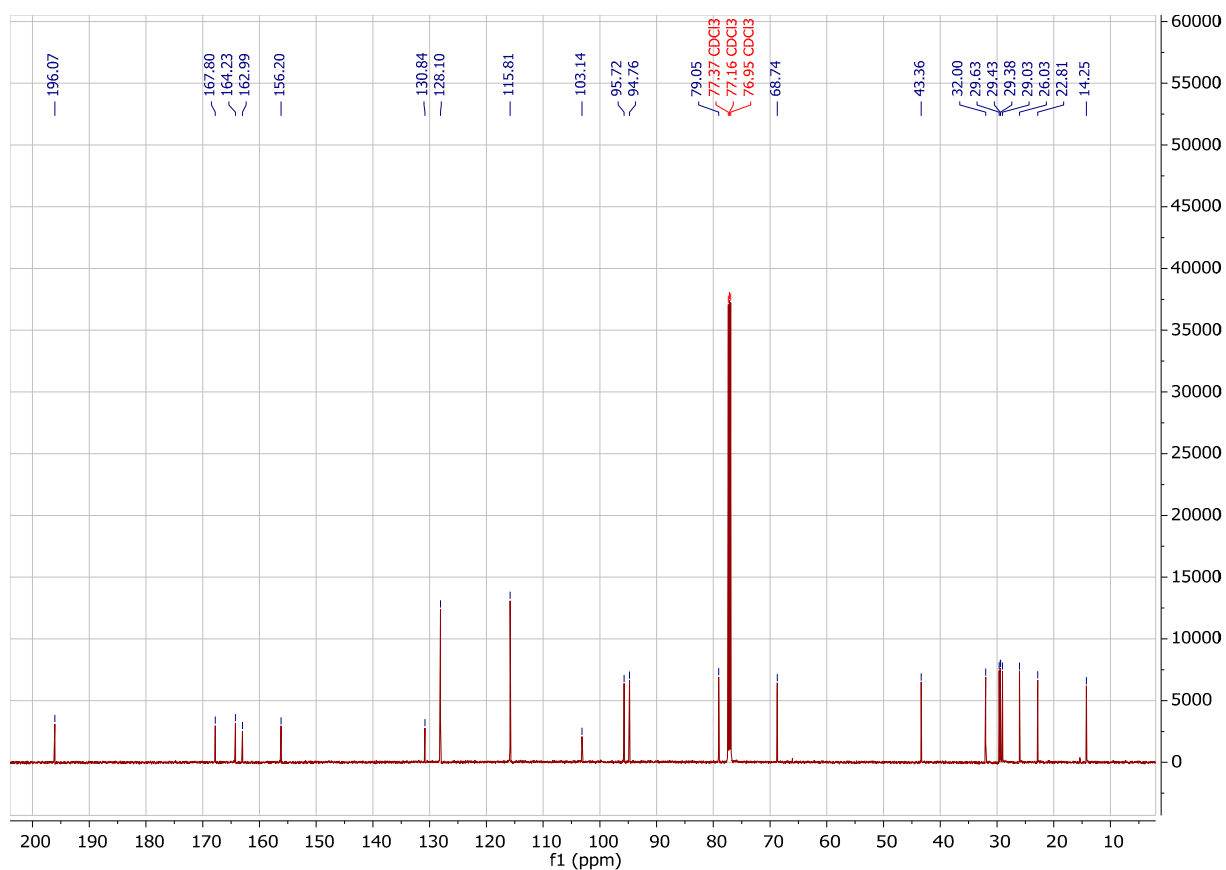

Figure S18.  $^{13}\text{C}$  NMR (150 MHz, chloroform-*d*) spectrum of 7-*O*-nonylnaringenin (**A7**)

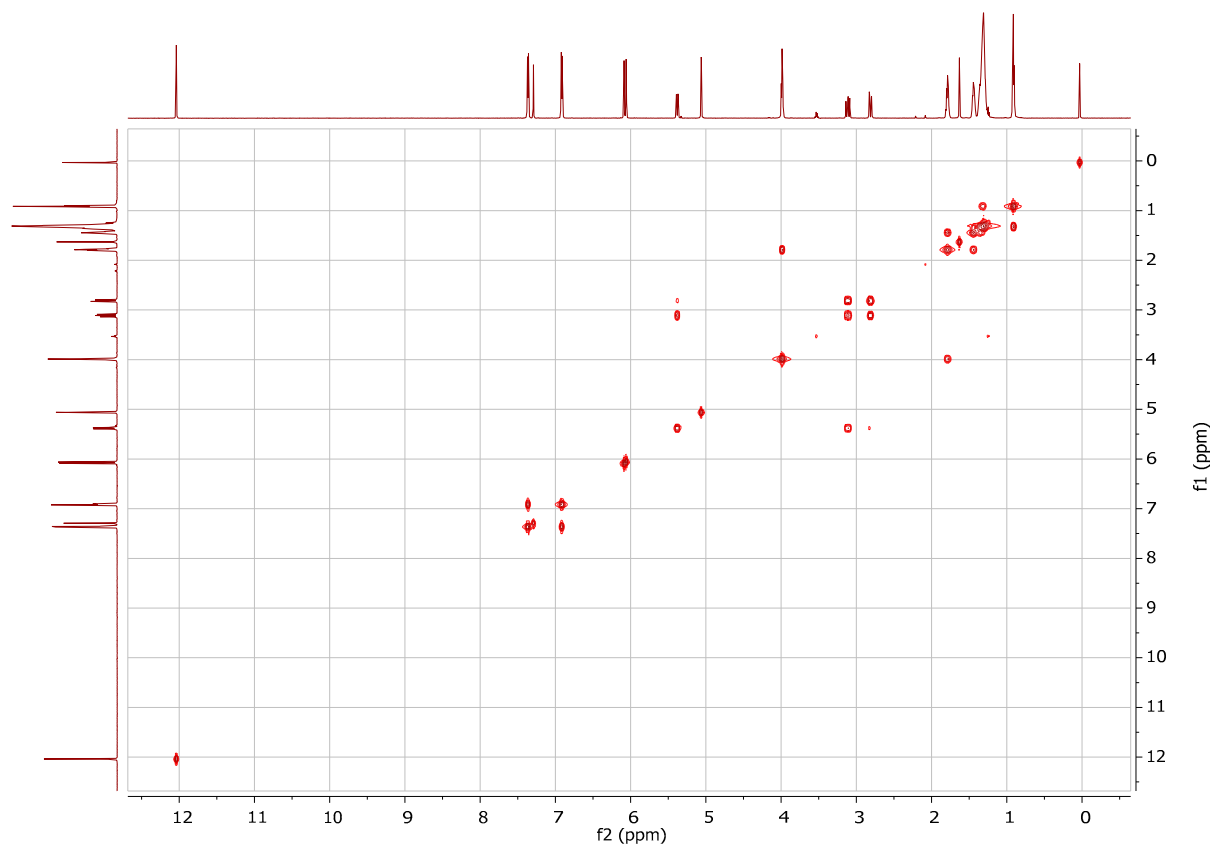

Figure S19. COSY NMR (150 MHz, chloroform-*d*) spectrum of 7-*O*-nonylnaringenin (**A7**)

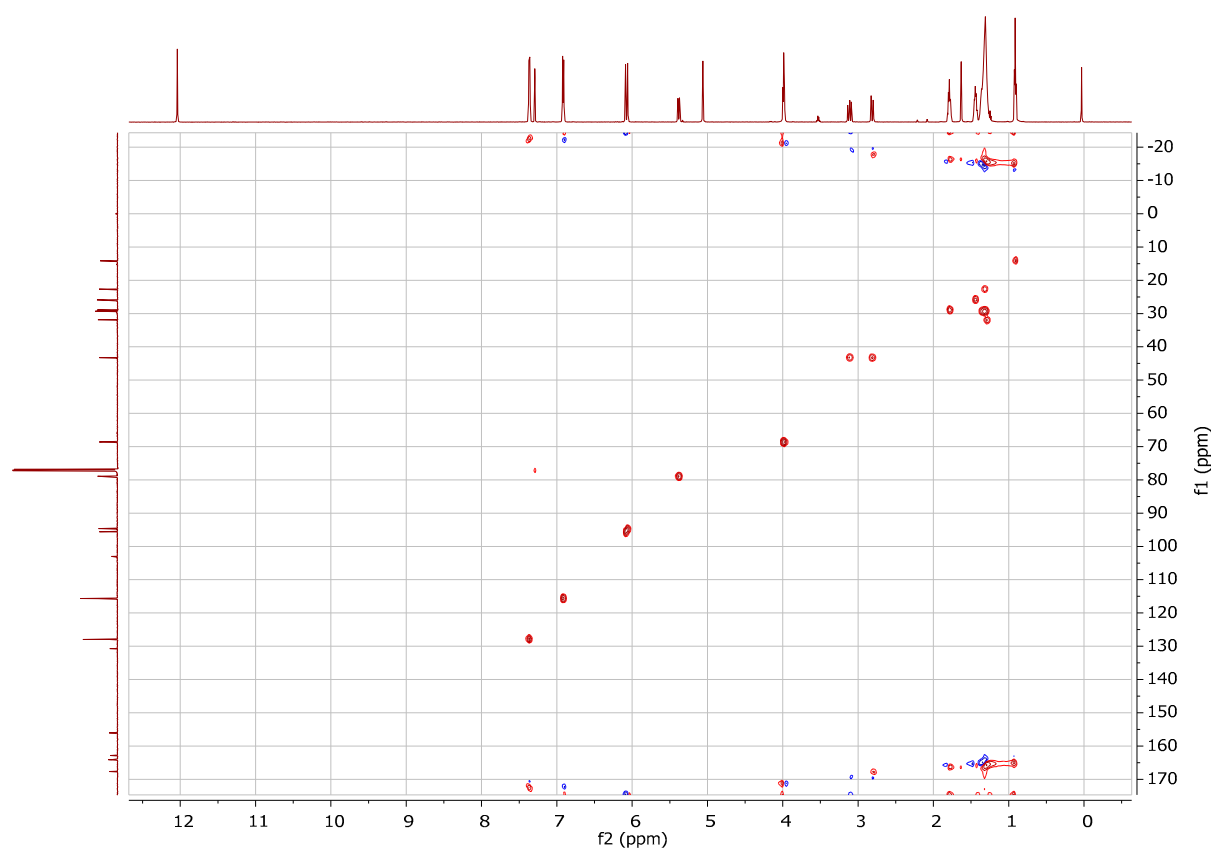

Figure S20. HSQC NMR (150 MHz, chloroform-*d*) spectrum of 7-*O*-nonylnaringenin (**A7**)

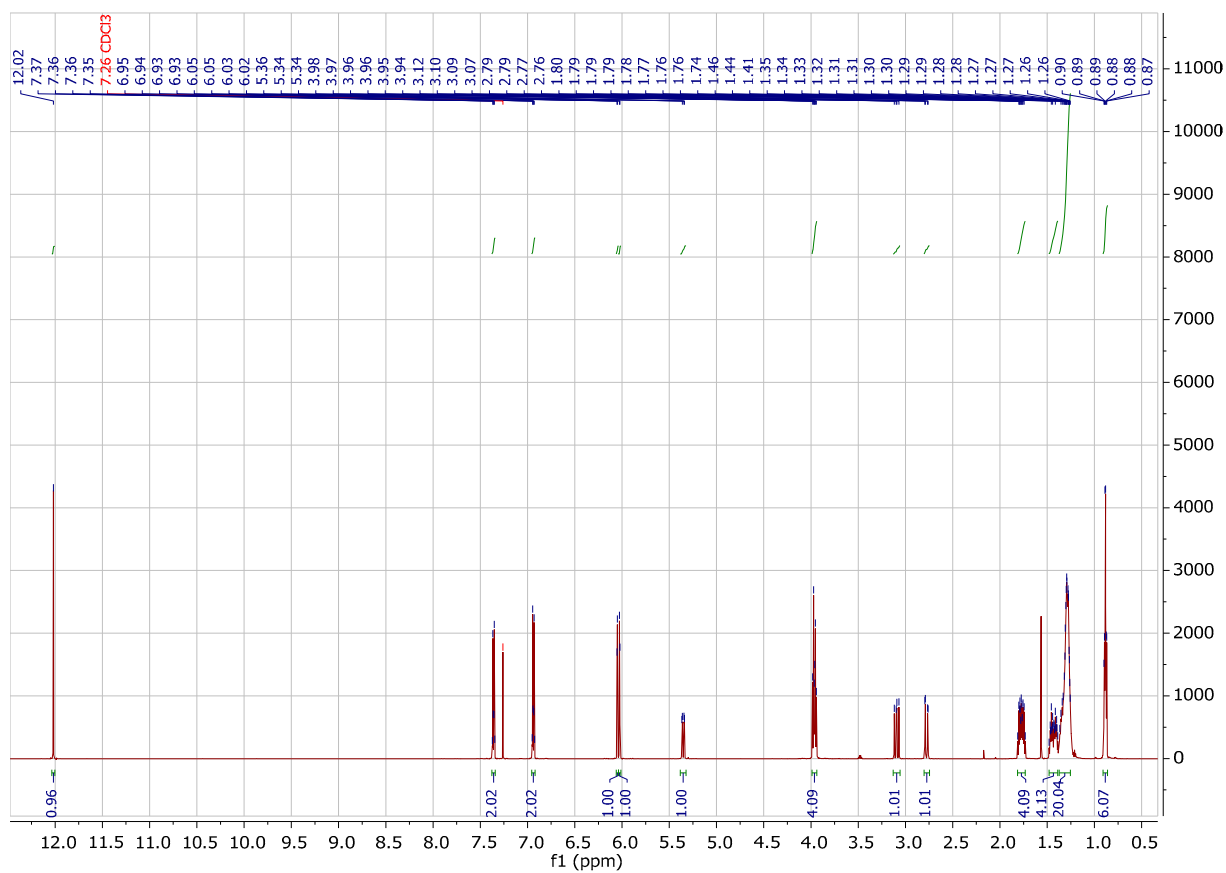

Figure S21. <sup>1</sup>H NMR (600 MHz, chloroform-*d*) spectrum of 7,4'-di-*O*-nonylnaringenin (**A8**)

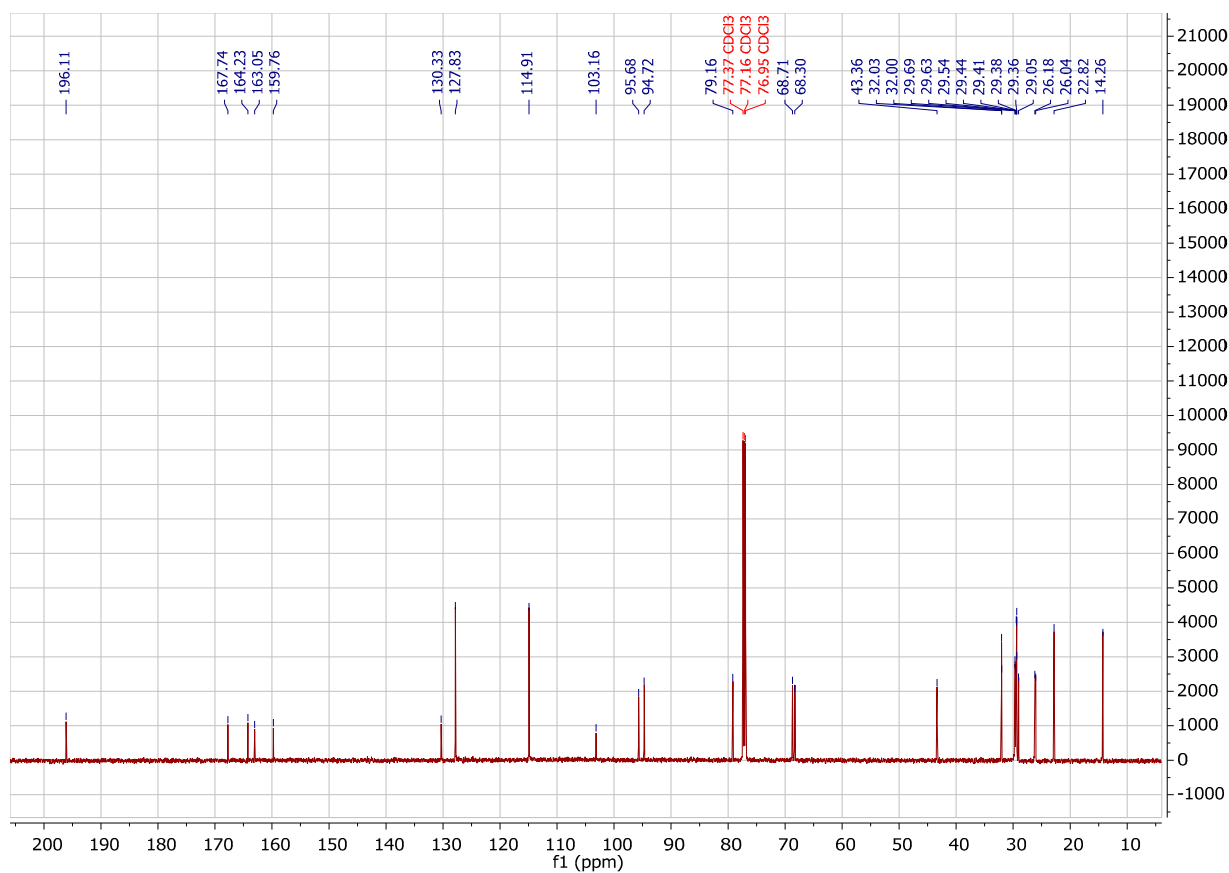

Figure S22. <sup>13</sup>C NMR (150 MHz, chloroform-*d*) spectrum of 7,4'-di-*O*-nonylnaringenin (**A8**)

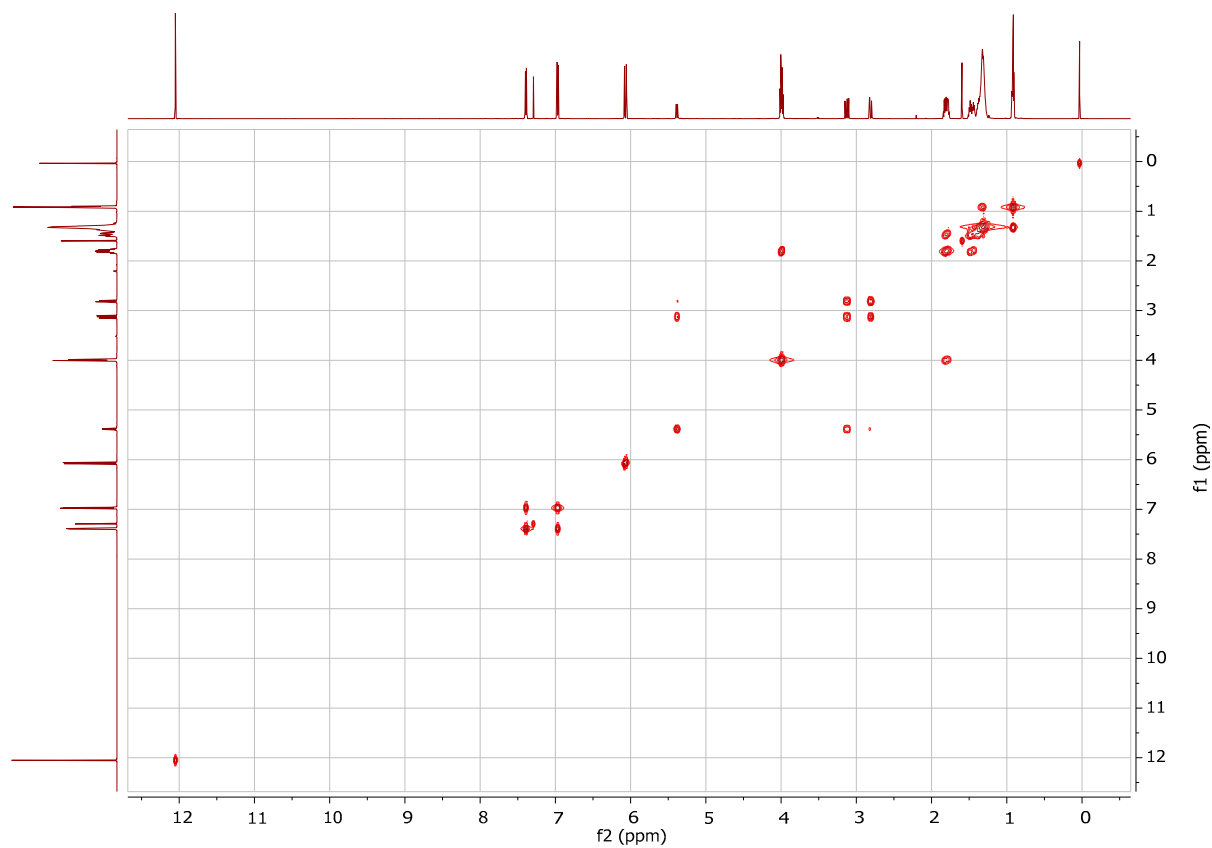

Figure S23. COSY NMR (150 MHz, chloroform-*d*) spectrum of 7,4'-di-*O*-nonylnaringenin (**A8**)

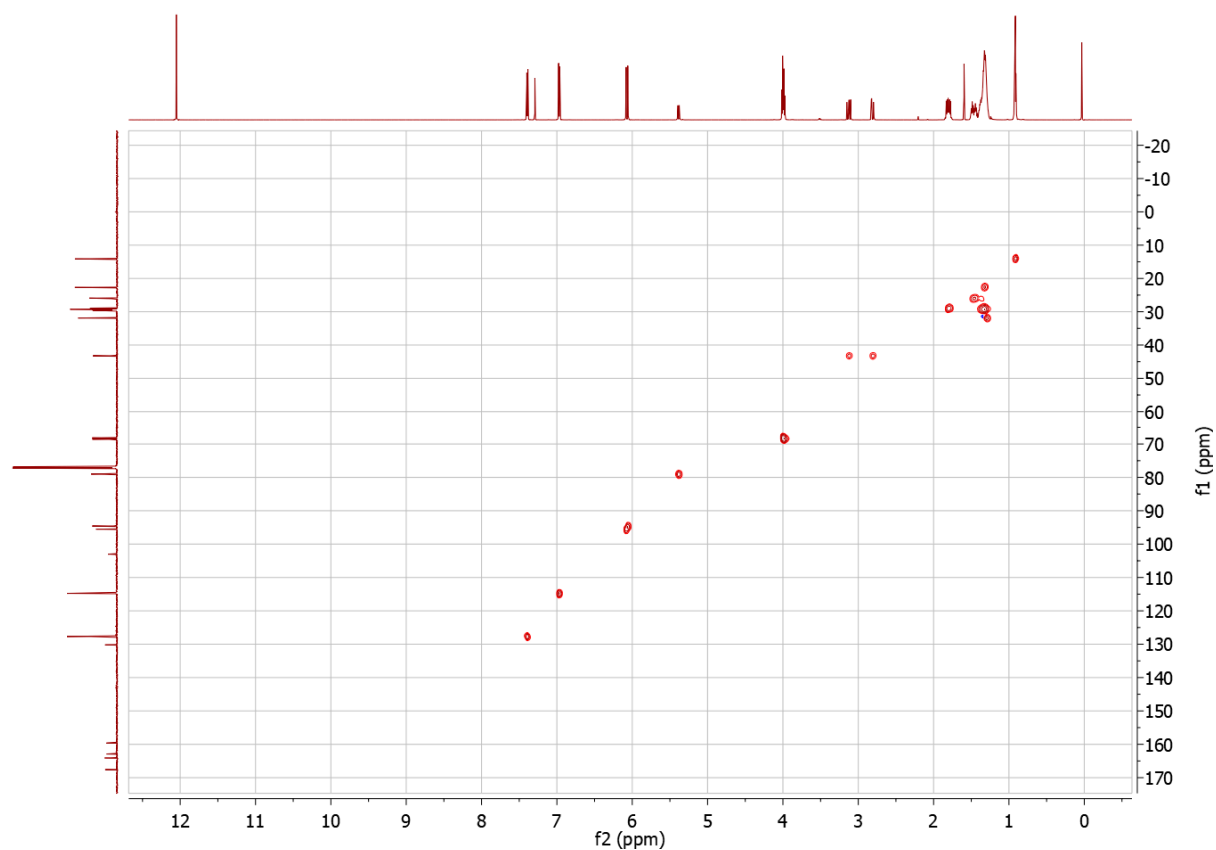

Figure S24. HSQC NMR (150 MHz, chloroform-*d*) spectrum of 7,4'-di-O-nonylnaringenin (A8)

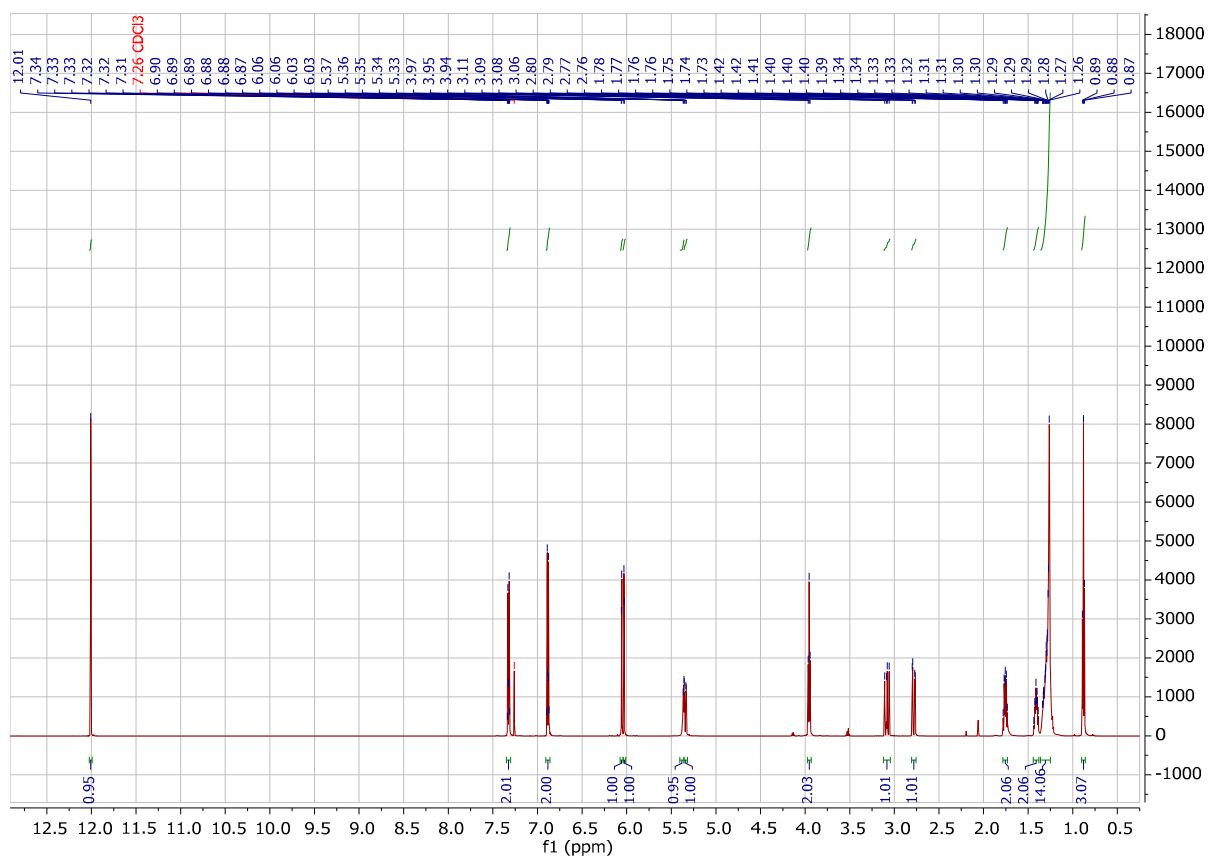

Figure S25.  $^1\text{H}$  NMR (600 MHz, chloroform-*d*) spectrum of 7-O-undecylnaringenin (A9)

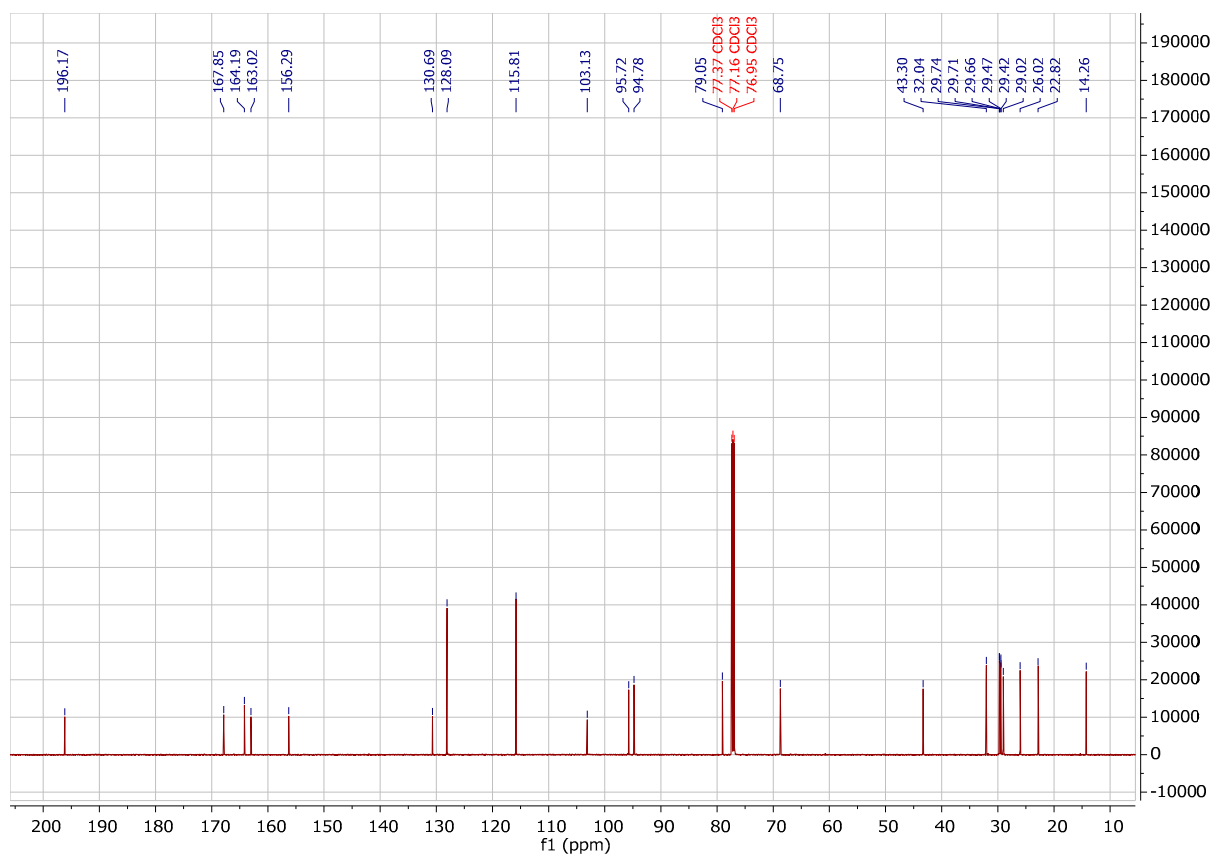

Figure S26. <sup>13</sup>C NMR (150 MHz, chloroform-*d*) spectrum of 7-*O*-undecylaringenin (**A9**)

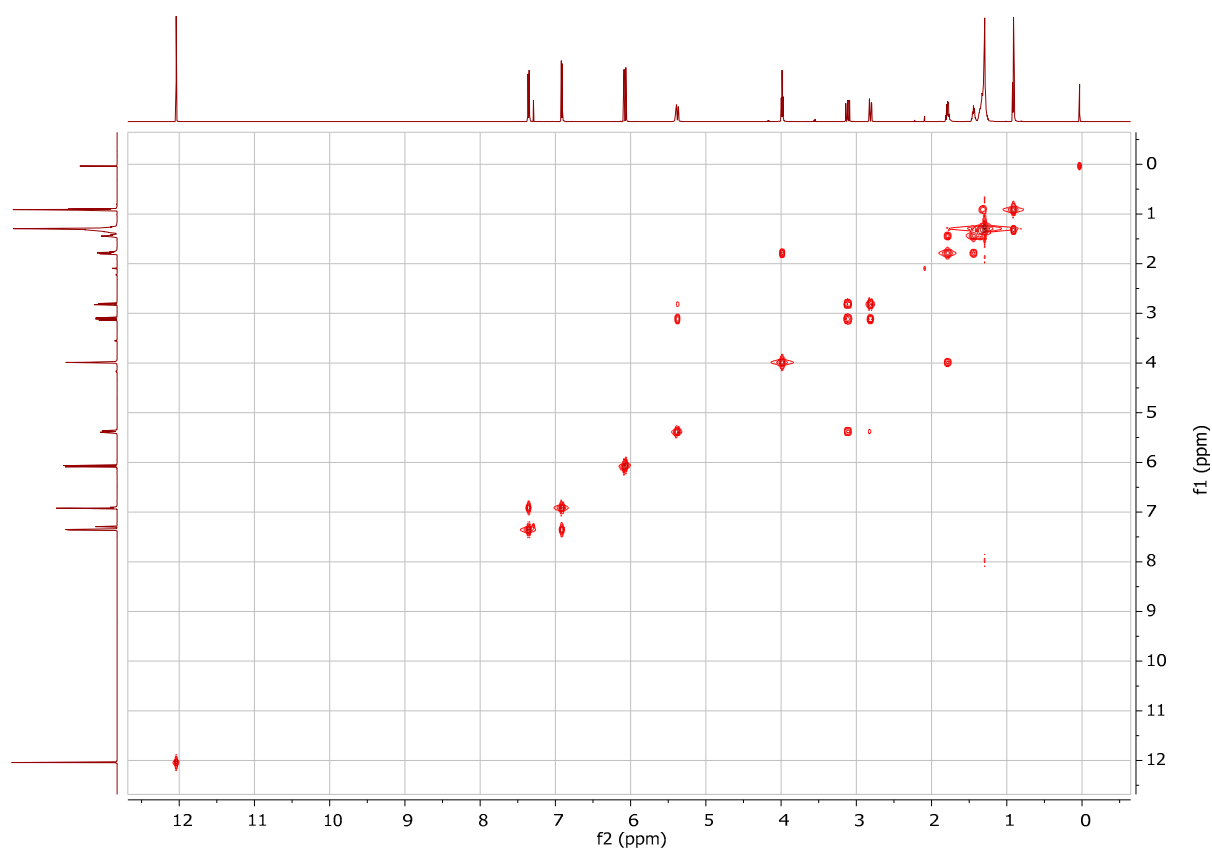

Figure S27. COSY NMR (150 MHz, chloroform-*d*) spectrum of 7-*O*-undecylaringenin (**A9**)



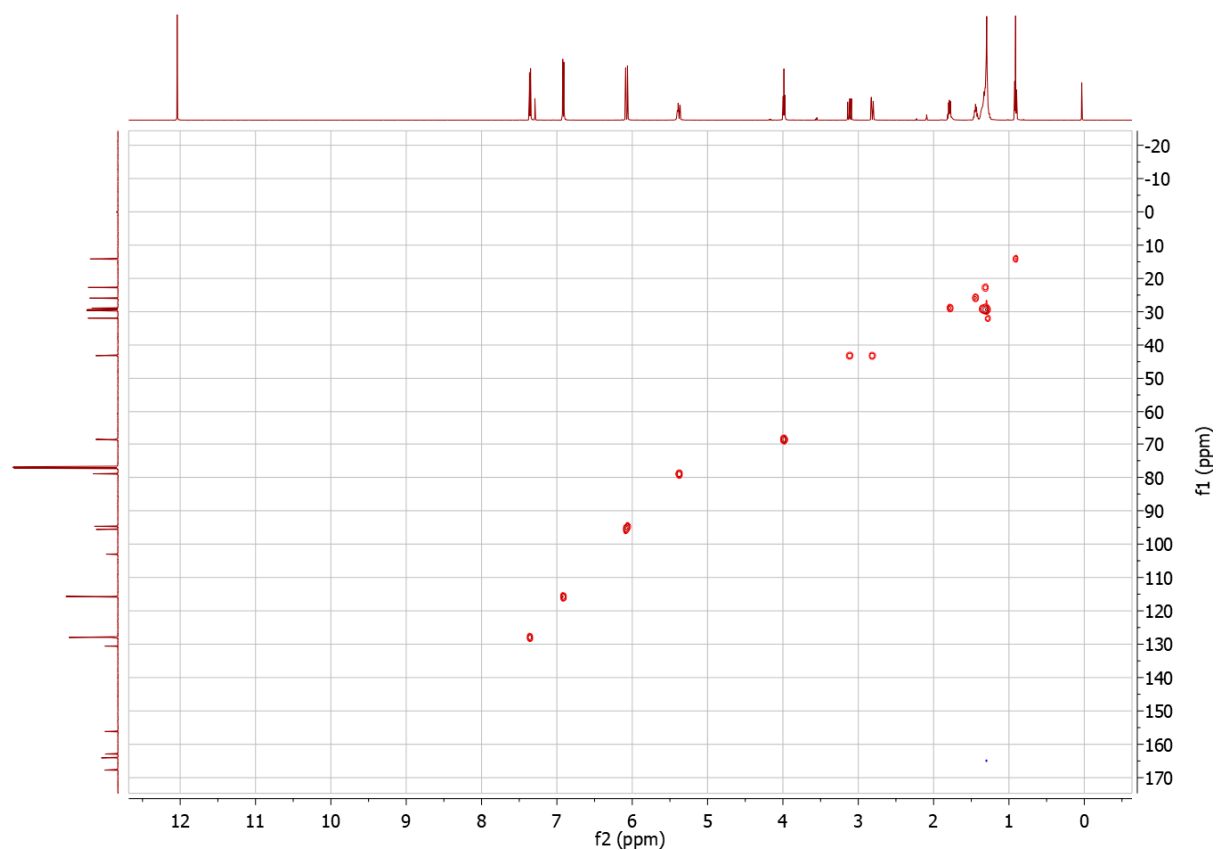

Figure S28. HSQC NMR (150 MHz, chloroform-*d*) spectrum of 7-*O*-undecylnaringenin (A9)

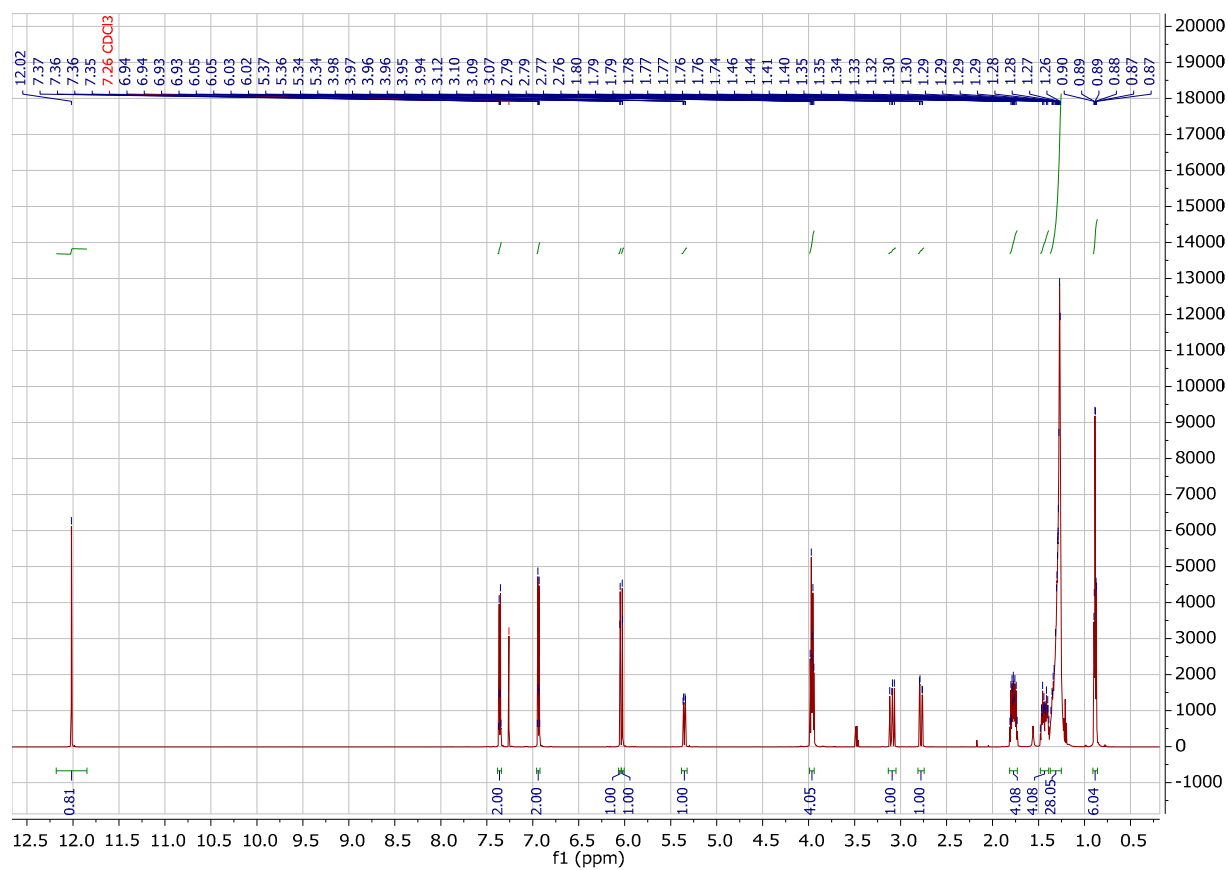

Figure S29.  $^1\text{H}$  NMR (600 MHz, chloroform-*d*) spectrum of 7,4'-di-*O*-undecylnaringenin (A10)

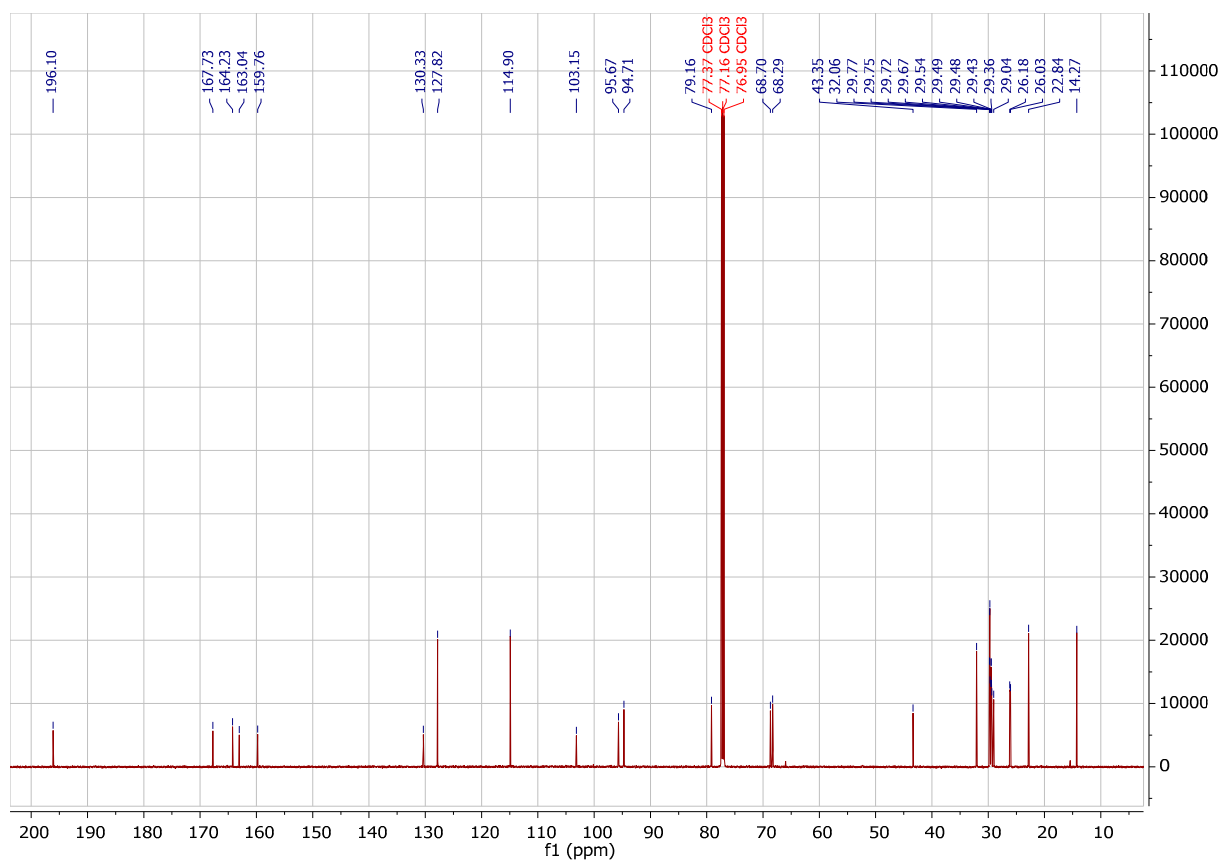

Figure S30.  $^{13}\text{C}$  NMR (150 MHz, chloroform-*d*) spectrum of 7,4'-di-*O*-undecylraringenin (**A10**)

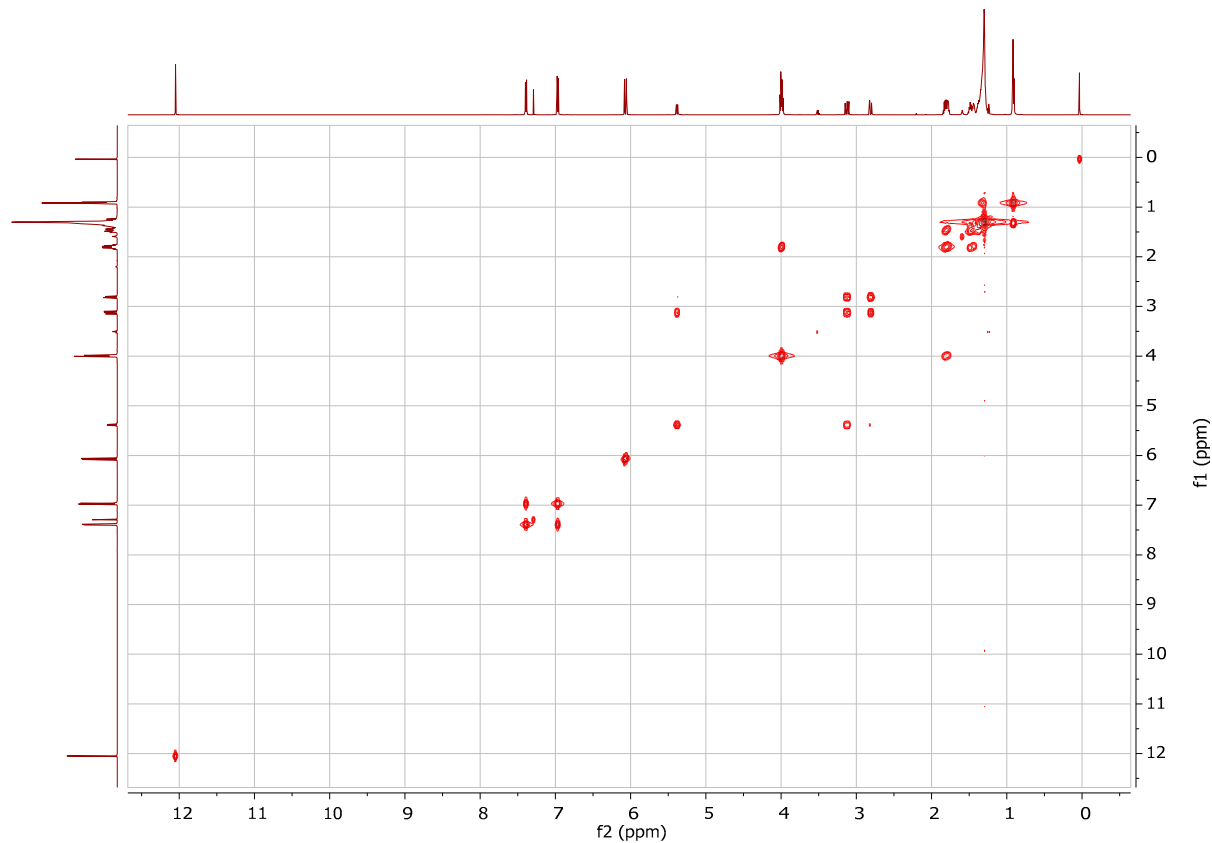

Figure S31. COSY NMR (150 MHz, chloroform-*d*) spectrum of 7,4'-di-*O*-undecylraringenin (**A10**)

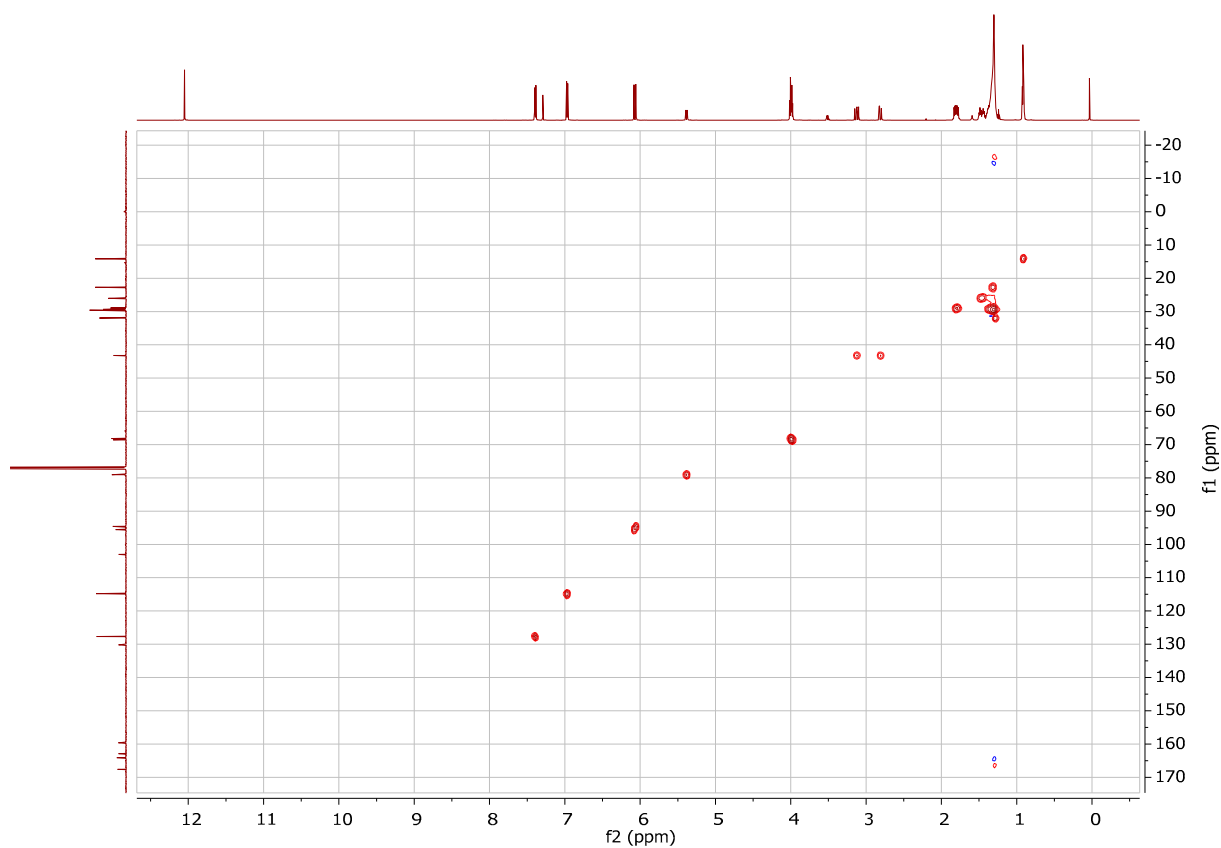

Figure S32. HSQC NMR (150 MHz, chloroform-*d*) spectrum of 7,4'-di-O-undecylnaringenin (**A10**)

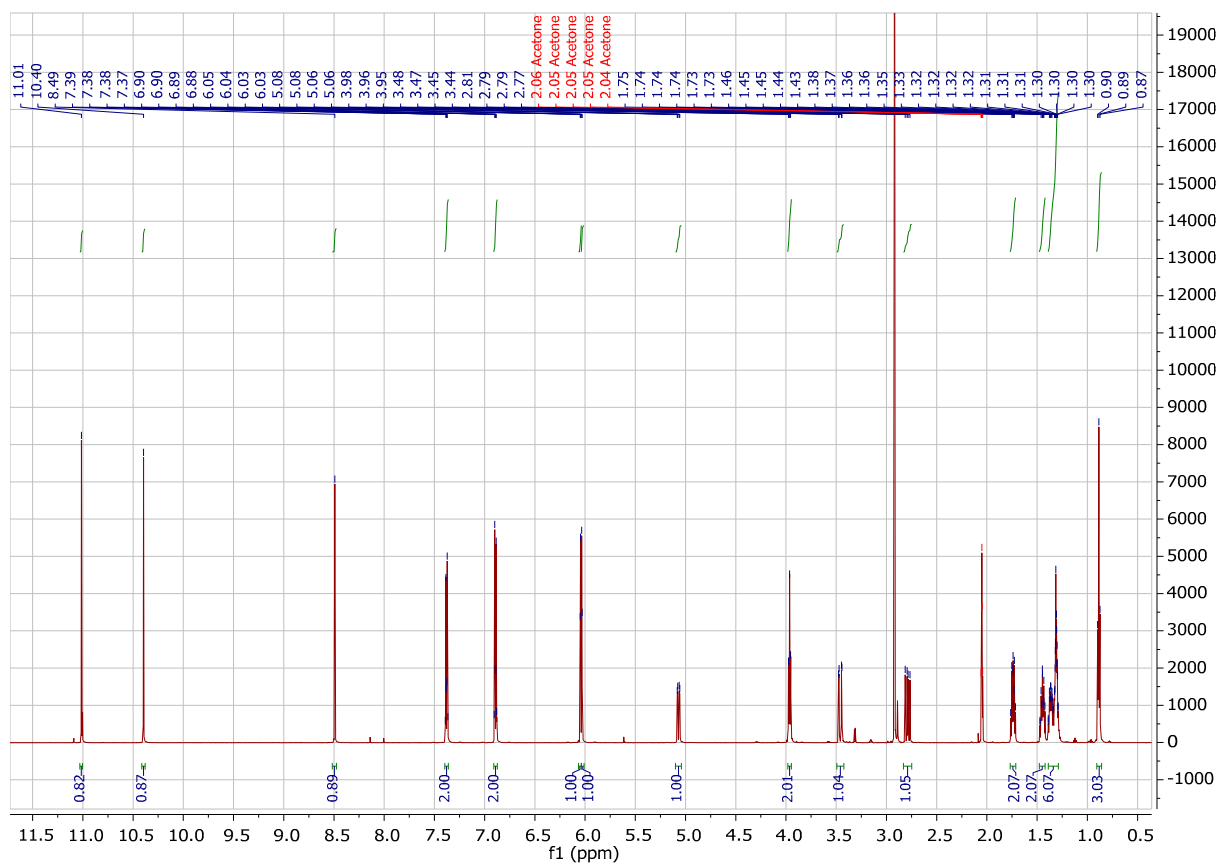

Figure S33.  $^1\text{H}$  NMR (600 MHz, acetone-*d*<sub>6</sub>) spectrum of 7-O-heptylnaringenin oxime (**B3**)

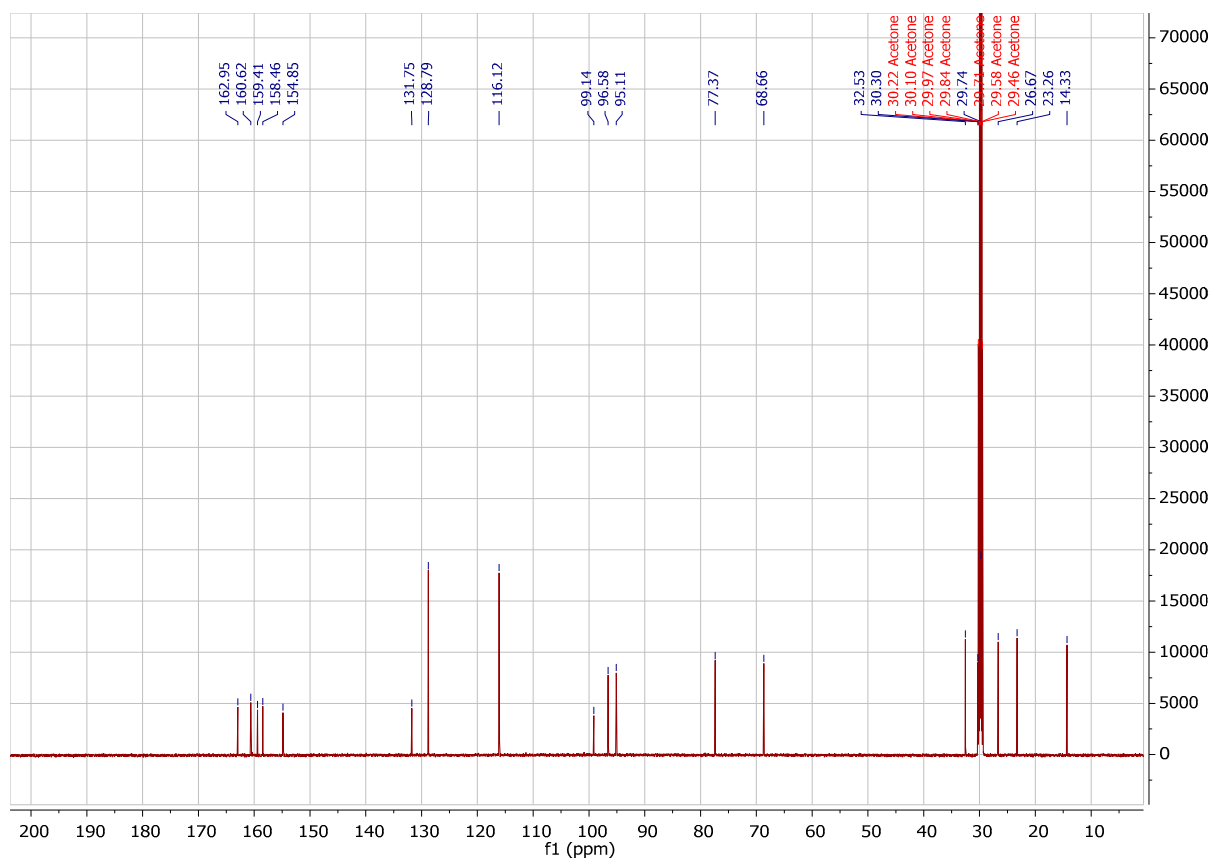

Figure S34.  $^{13}\text{C}$  NMR (150 MHz, acetone- $d_6$ ) spectrum of 7-*O*-heptylnaringenin oxime (**B3**)

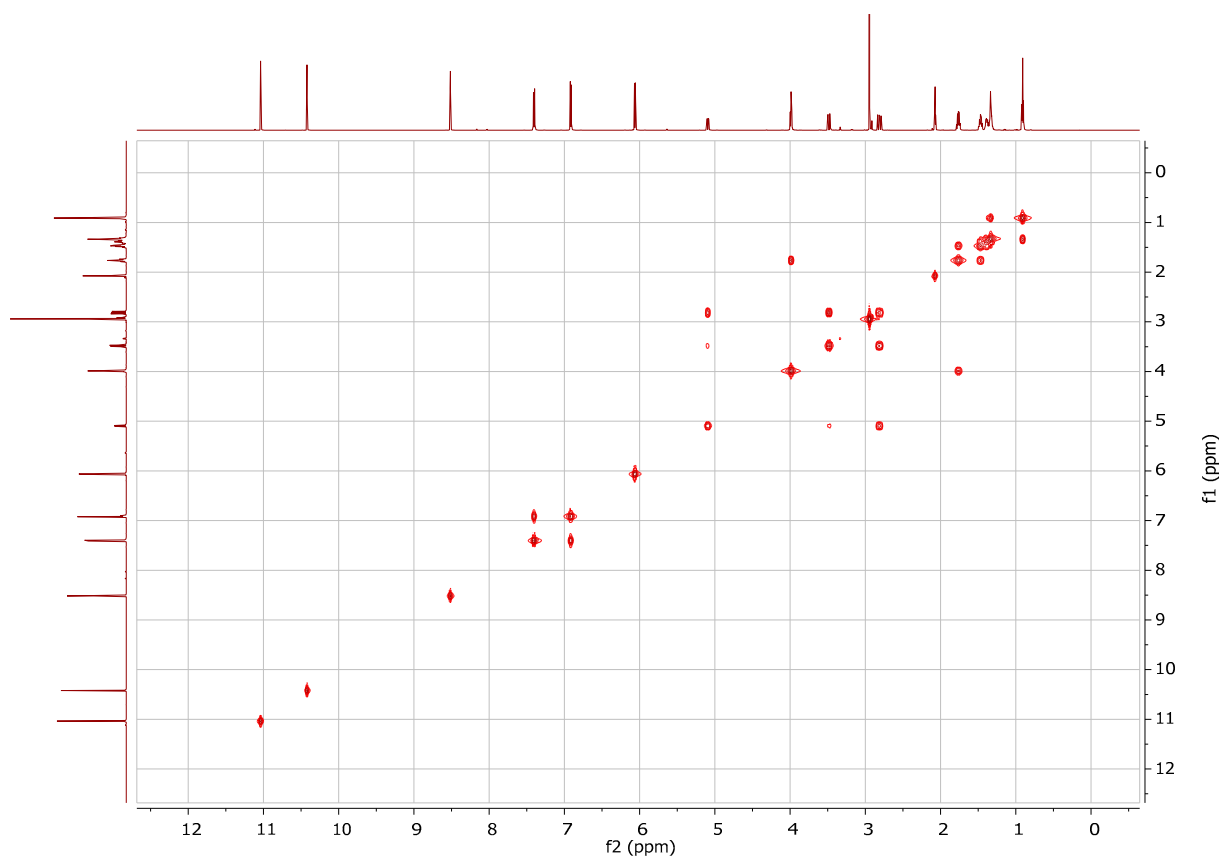

Figure S35. COSY NMR (150 MHz, acetone- $d_6$ ) spectrum of 7-*O*-heptylnaringenin oxime (**B3**)

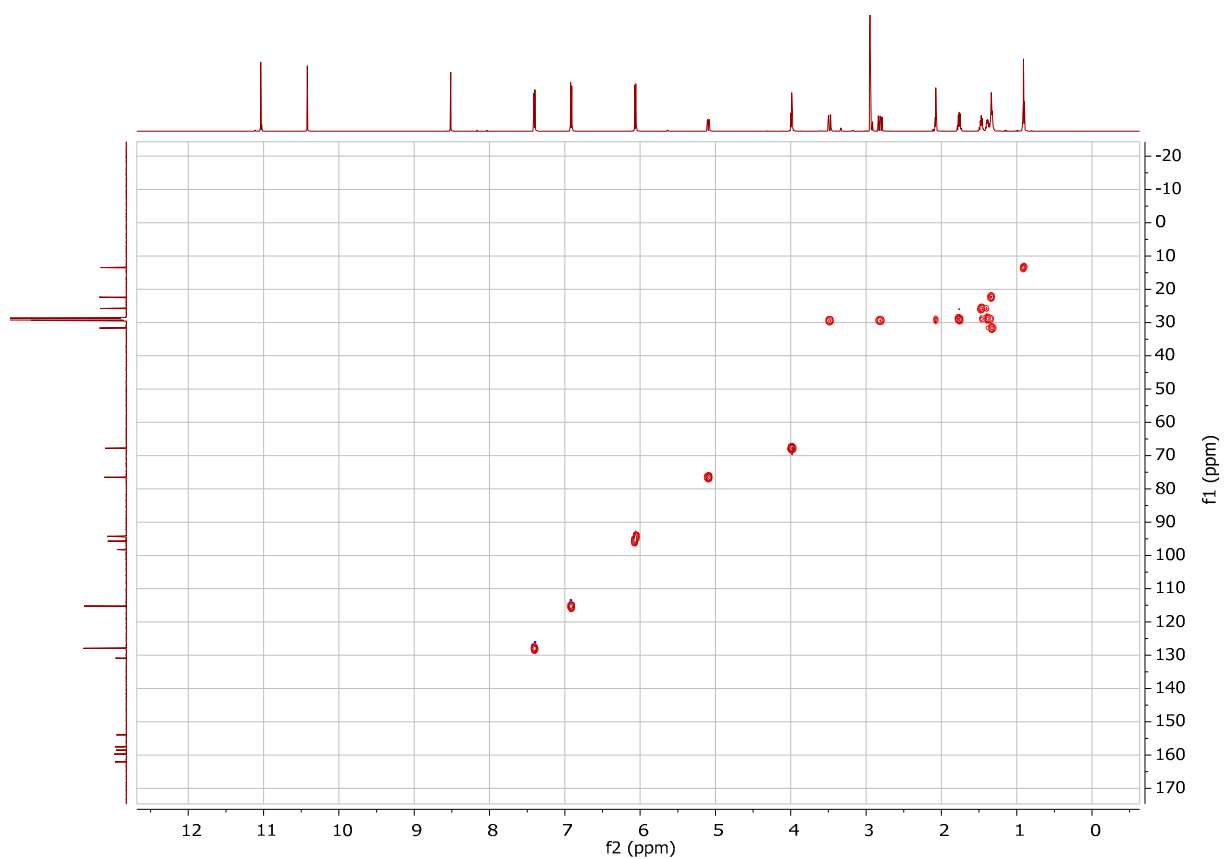

Figure S36. HSQC NMR (150 MHz, acetone- $d_6$ ) spectrum of 7-O-heptylnaringenin oxime (**B3**)

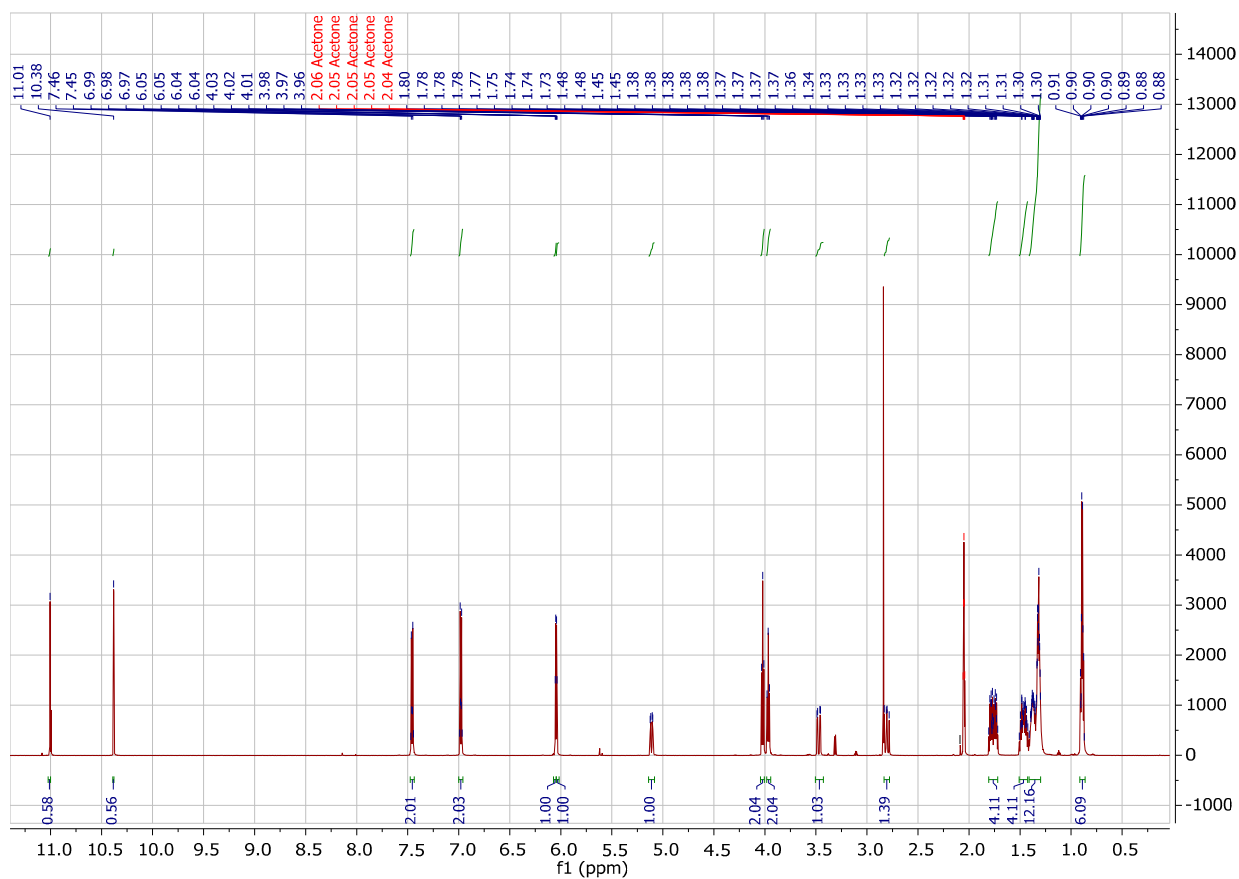

Figure S37.  $^1\text{H}$  NMR (600 MHz, acetone- $d_6$ ) spectrum of 7,4'-di-O-heptylnaringenin oxime (**B4**)

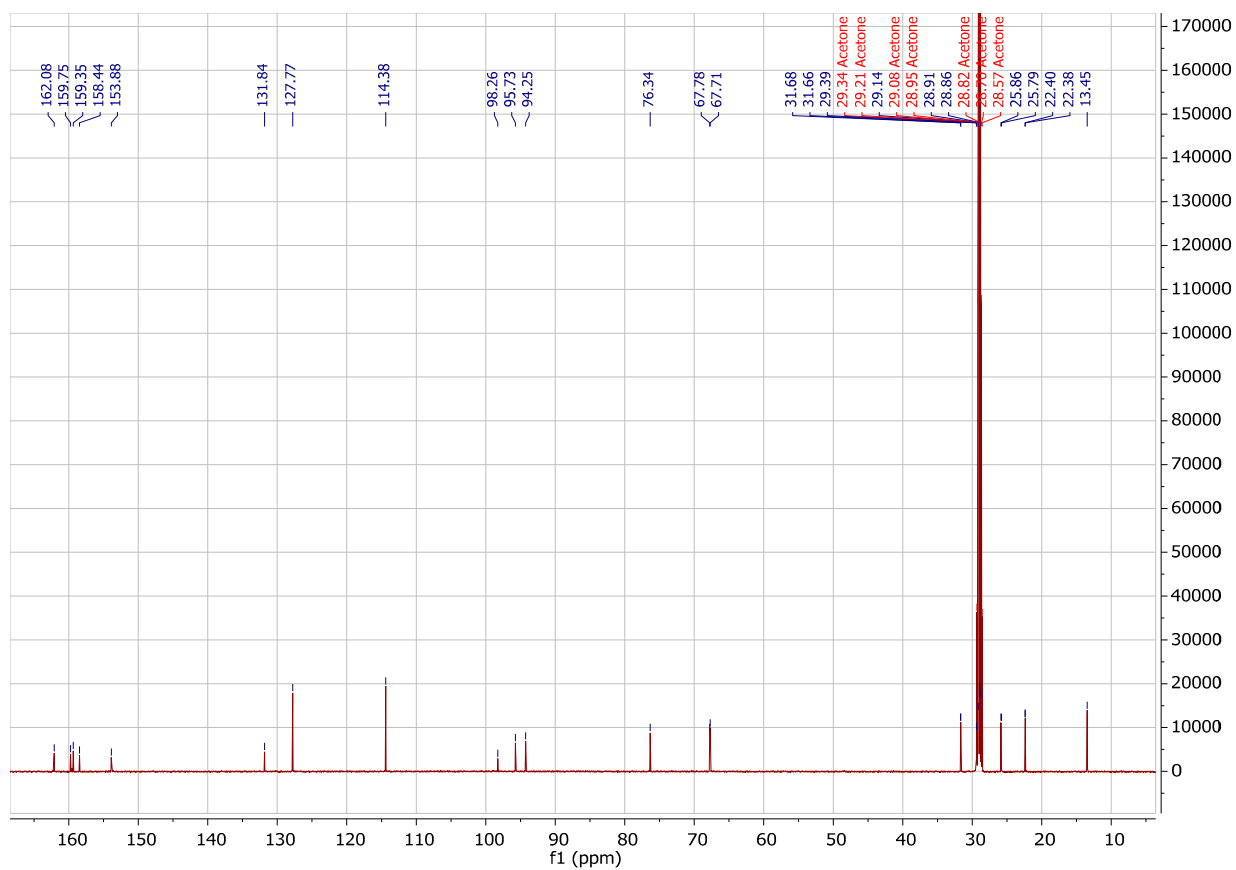

Figure S38.  $^{13}\text{C}$  NMR (150 MHz, acetone- $d_6$ ) spectrum of 7,4'-di-O-heptylnaringenin oxime (**B4**)

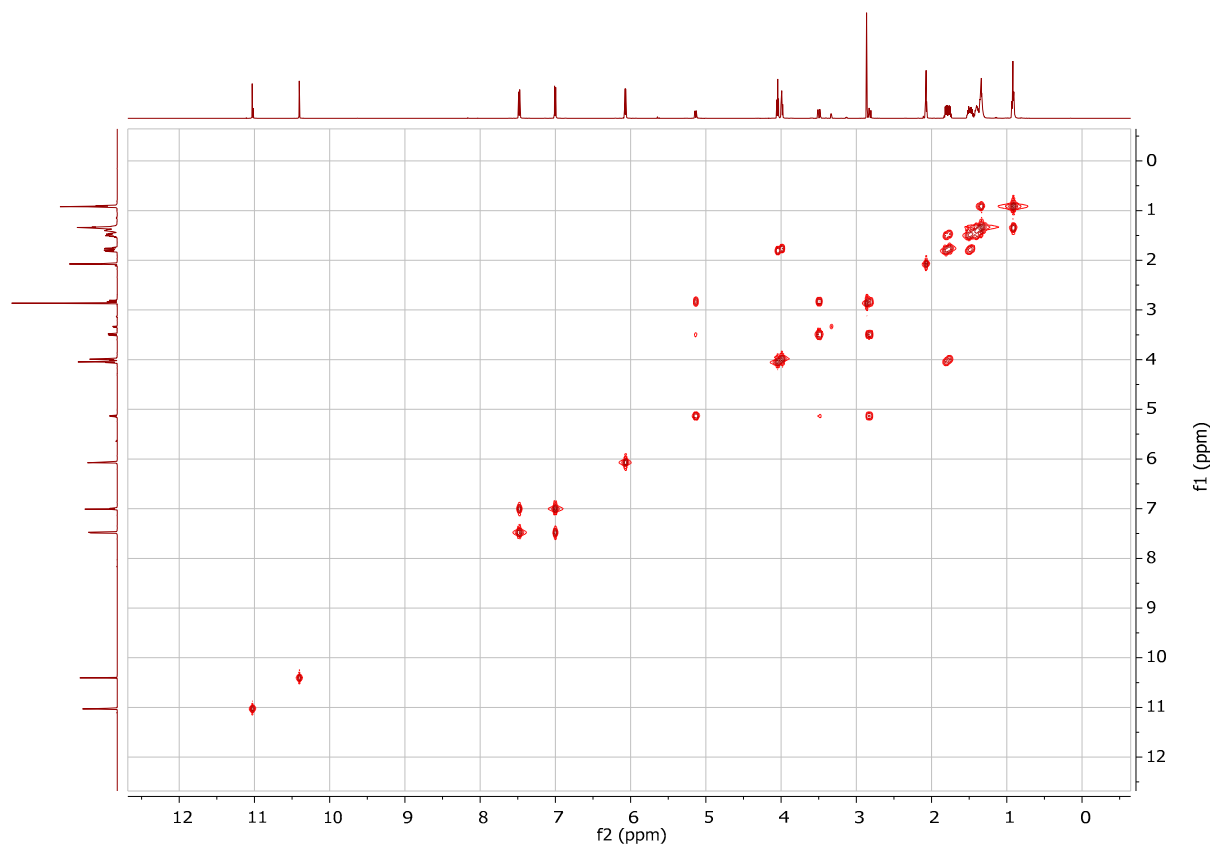

Figure S39. COSY NMR (150 MHz, acetone- $d_6$ ) spectrum of 7,4'-di-O-heptylnaringenin oxime (**B4**)

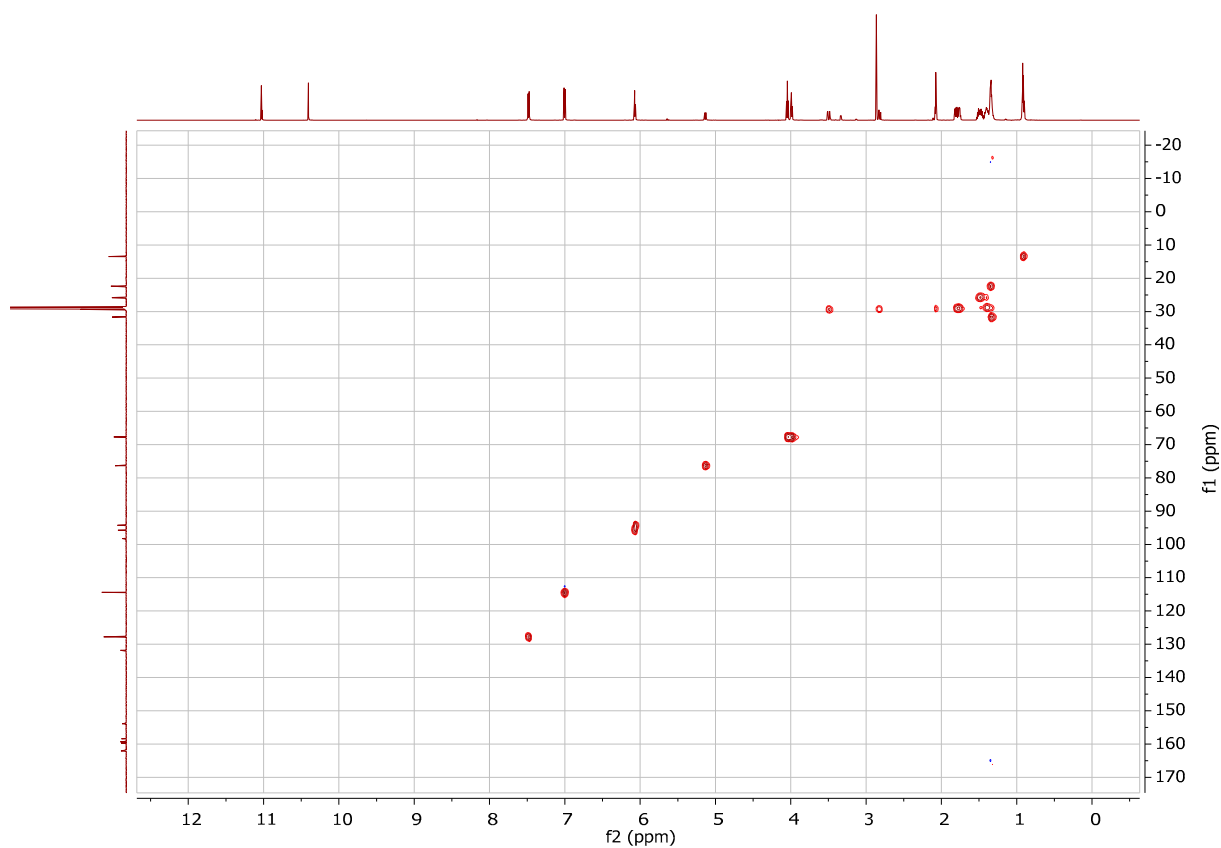

Figure S40. HSQC NMR (150 MHz, acetone- $d_6$ ) spectrum of 7,4'-di-O-heptylnaringenin oxime (**B4**)

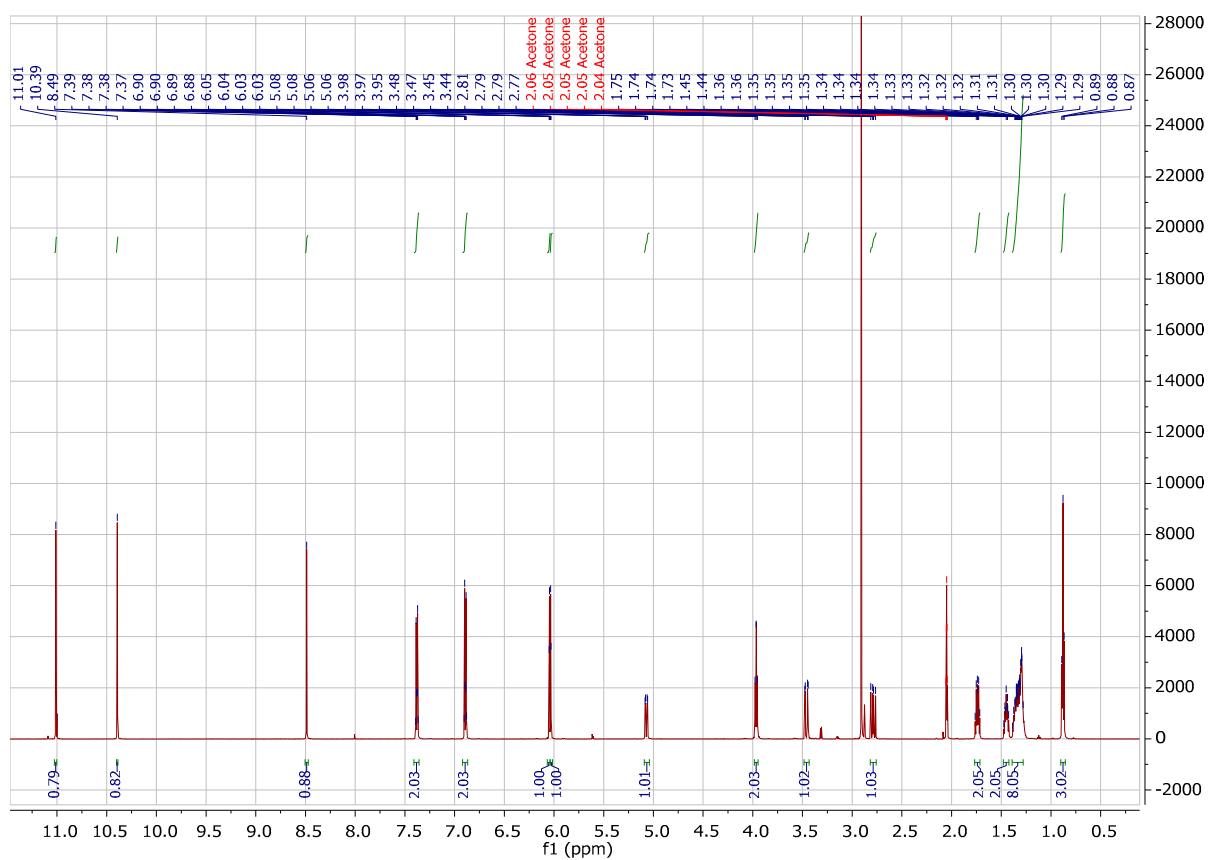

Figure S41.  $^1\text{H}$  NMR (600 MHz, acetone- $d_6$ ) spectrum of 7-O-octylningerin oxime (**B5**)

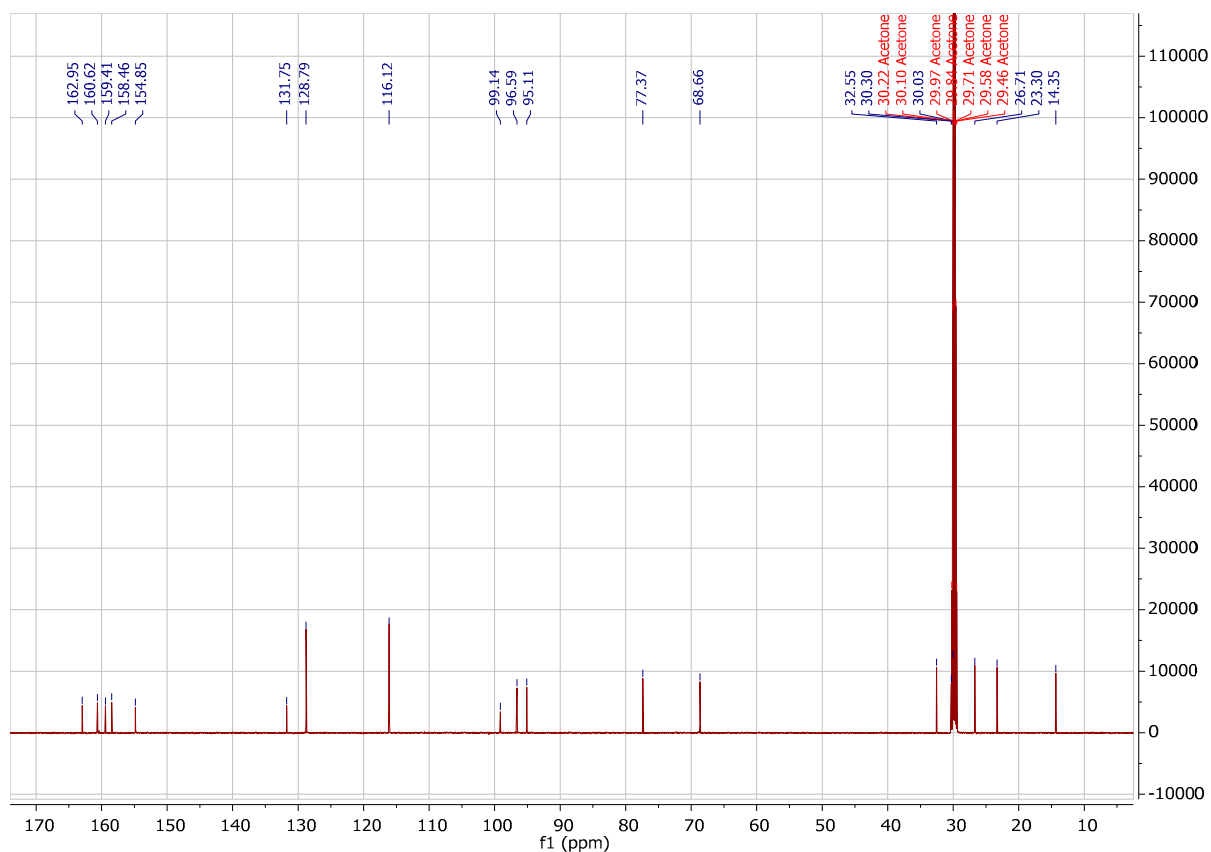

Figure S42.  $^{13}\text{C}$  NMR (150 MHz, acetone- $d_6$ ) spectrum of 7-O-octylnaringenin oxime (**B5**)

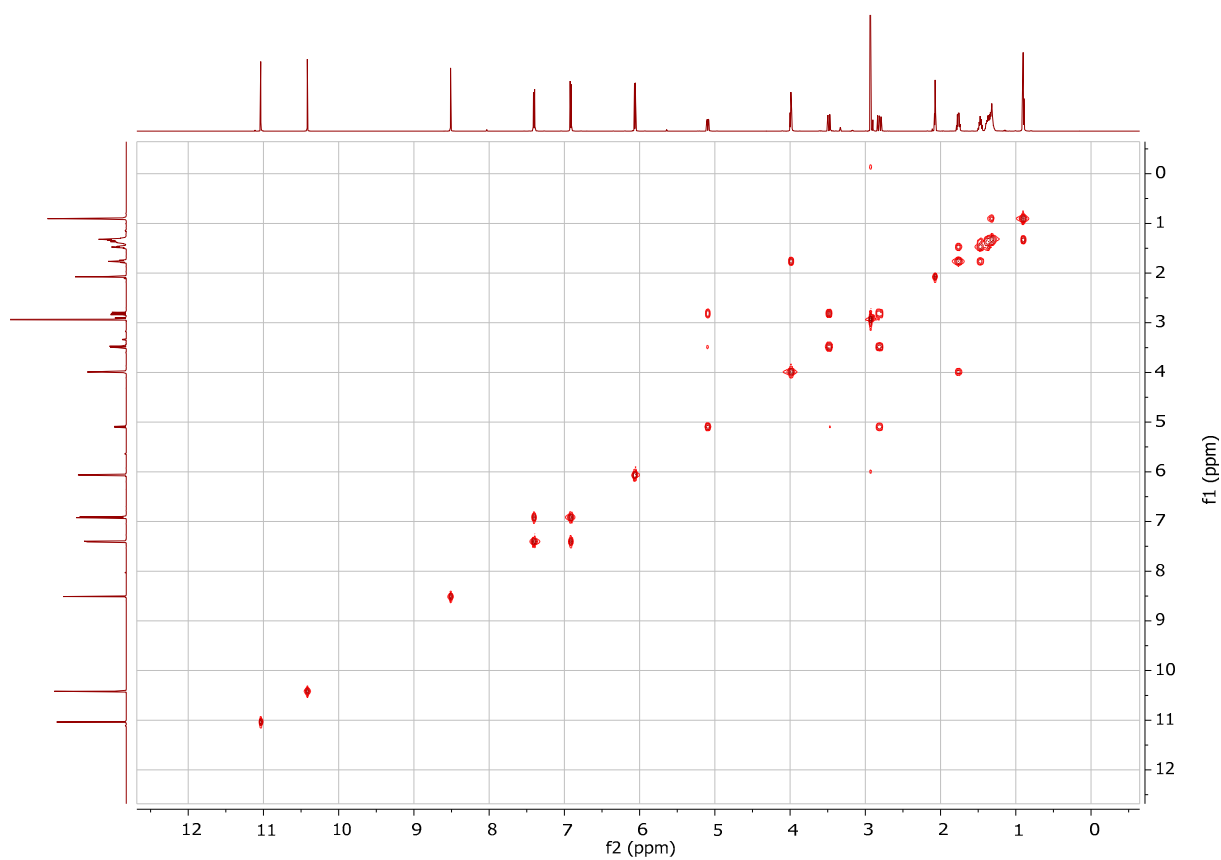

Figure S43. COSY NMR (150 MHz, acetone- $d_6$ ) spectrum of 7-O-octylnaringenin oxime (**B5**)



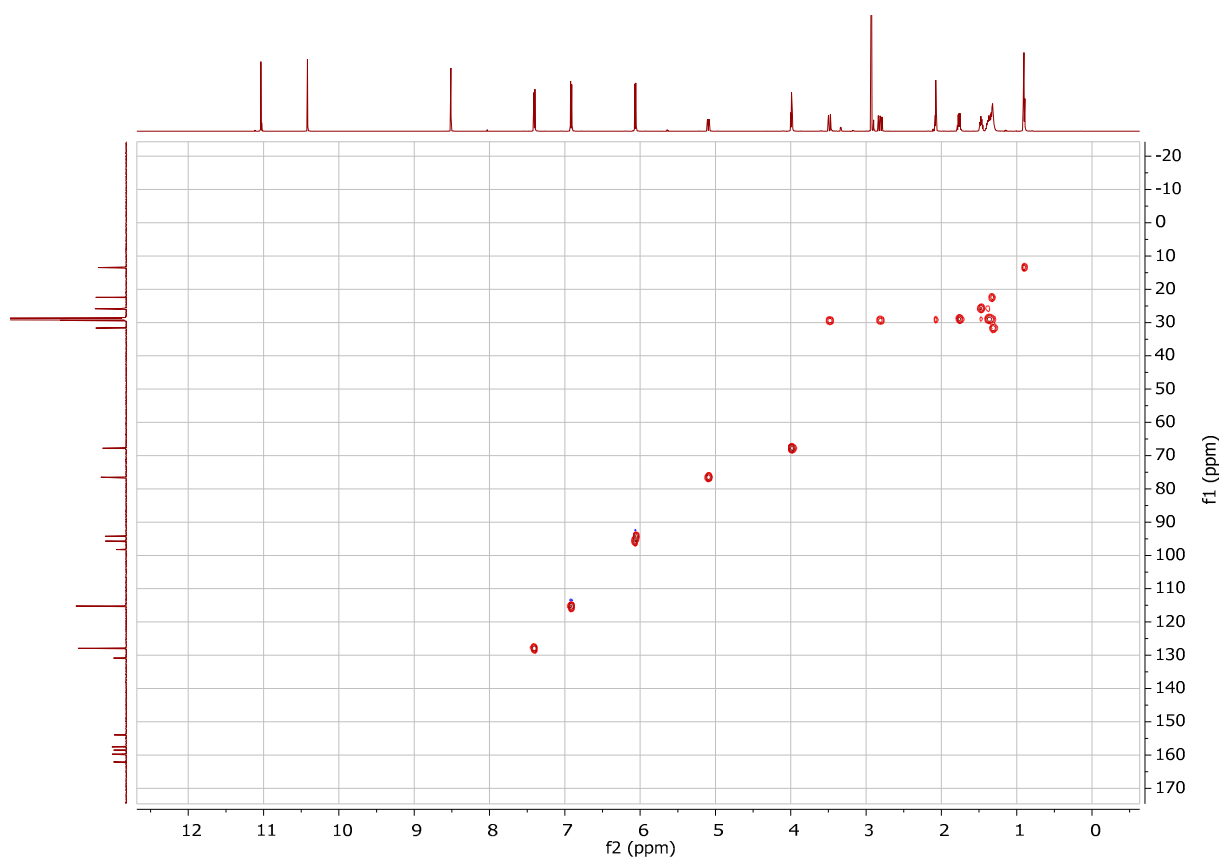

Figure S44. HSQC NMR (150 MHz, acetone- $d_6$ ) spectrum of 7-*O*-octylningerin oxime (**B5**)

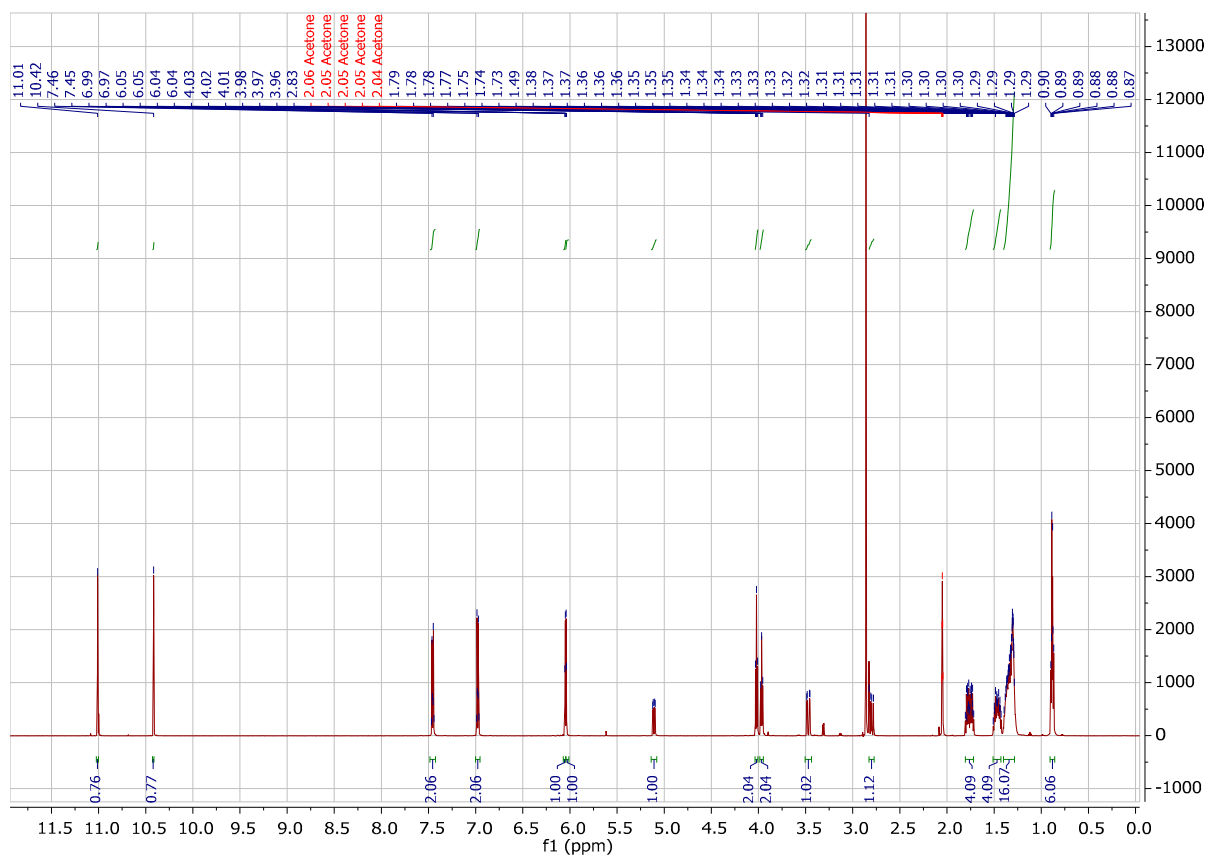

Figure S45.  $^1\text{H}$  NMR (600 MHz, acetone- $d_6$ ) spectrum of 7,4'-di-*O*-octylningerin oxime (**B6**)

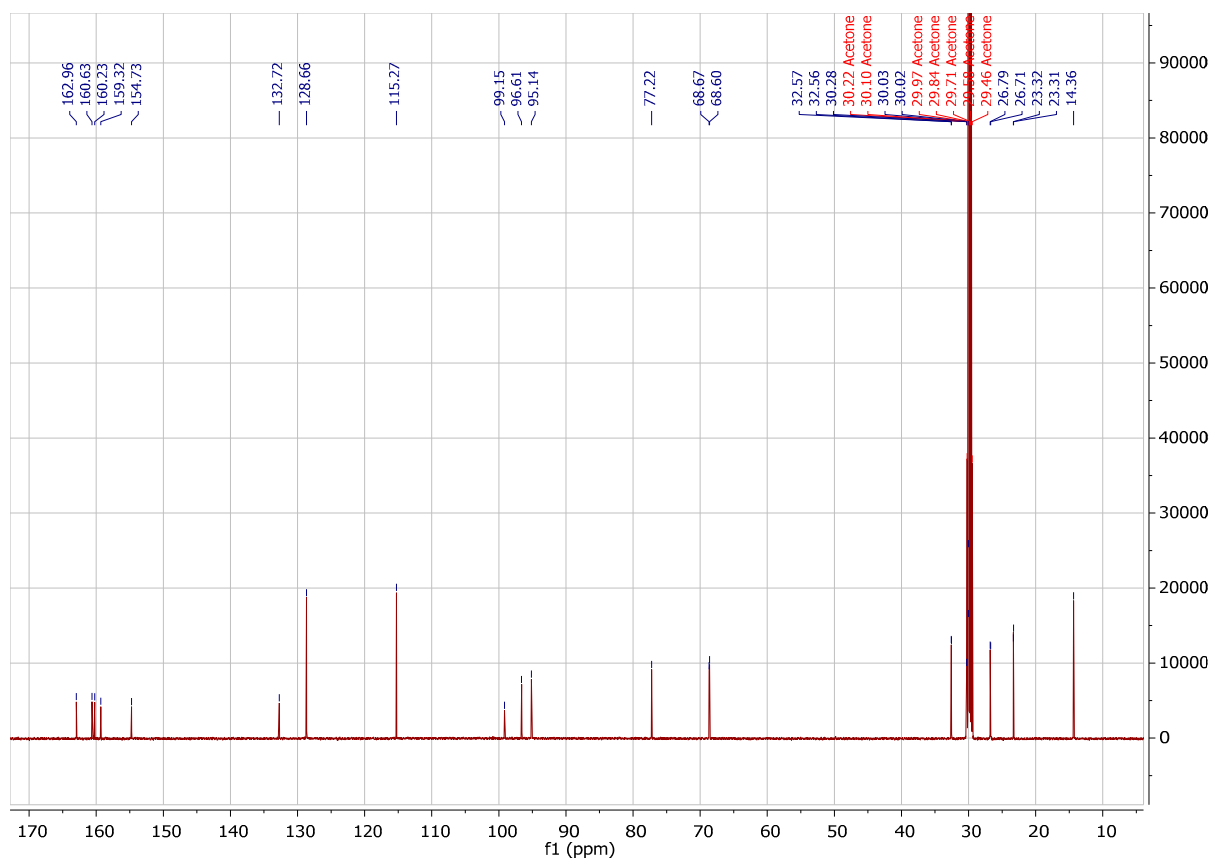

Figure S46.  $^{13}\text{C}$  NMR (150 MHz, acetone- $d_6$ ) spectrum of 7,4'-di-O-octylnaringenin oxime (**B6**)

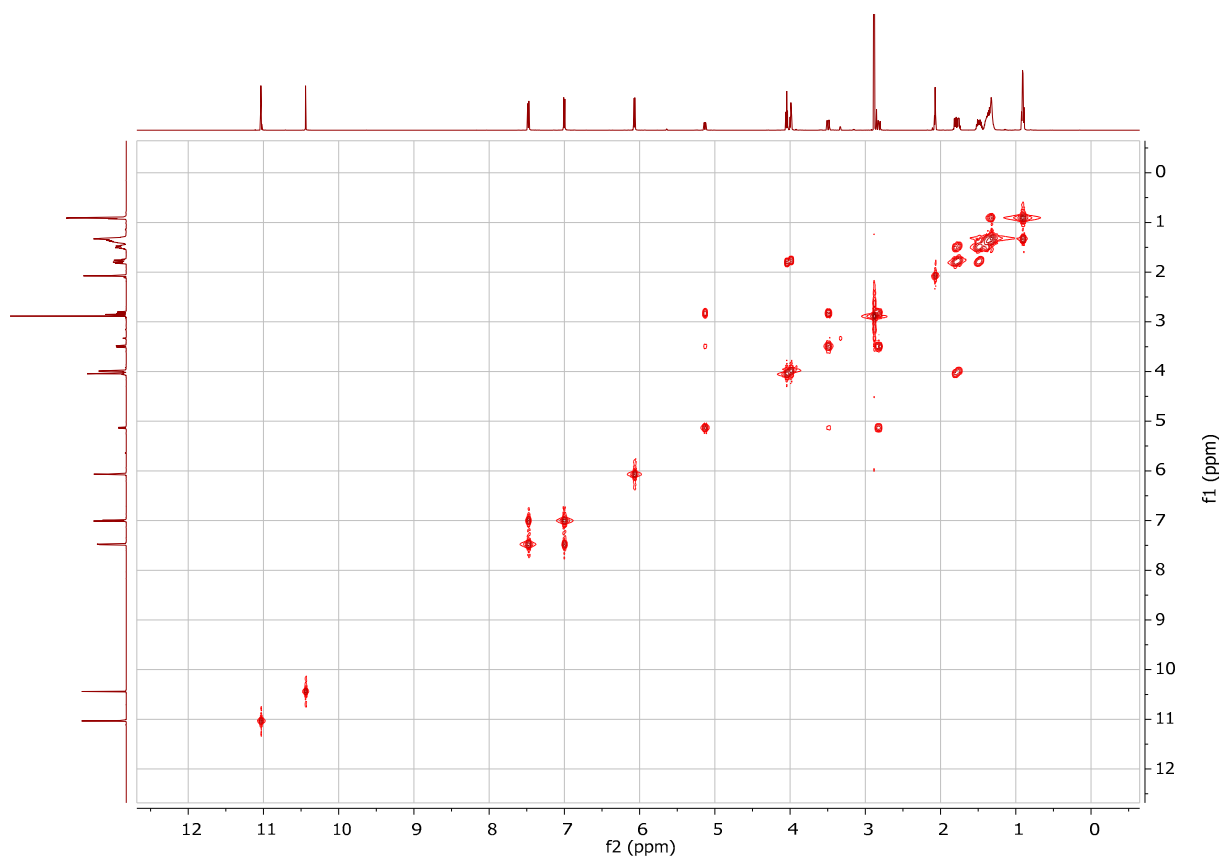

Figure S47. COSY NMR (150 MHz, acetone- $d_6$ ) spectrum of 7,4'-di-O-octylnaringenin oxime (**B6**)

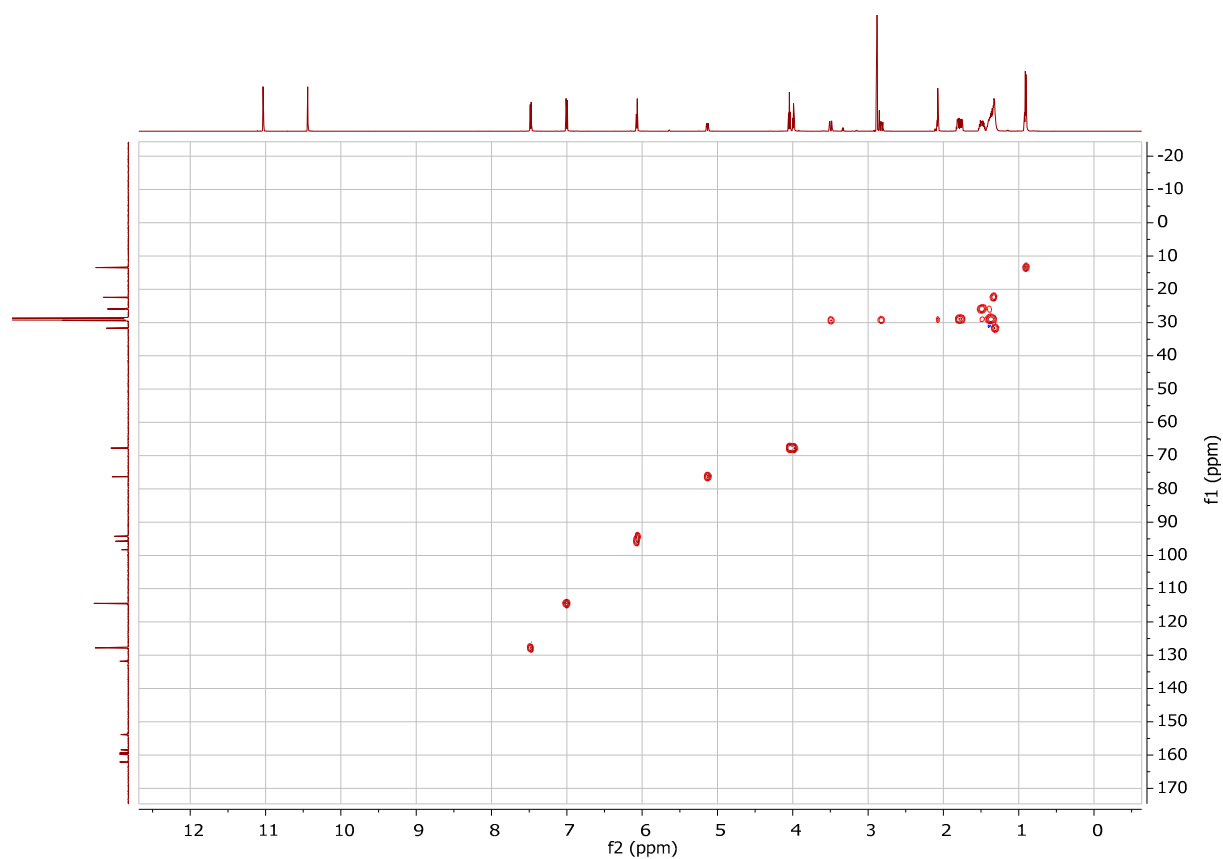

Figure S48. HSQC NMR (150 MHz, acetone- $d_6$ ) spectrum of 7,4'-di-O-octylaringenin oxime (**B6**)

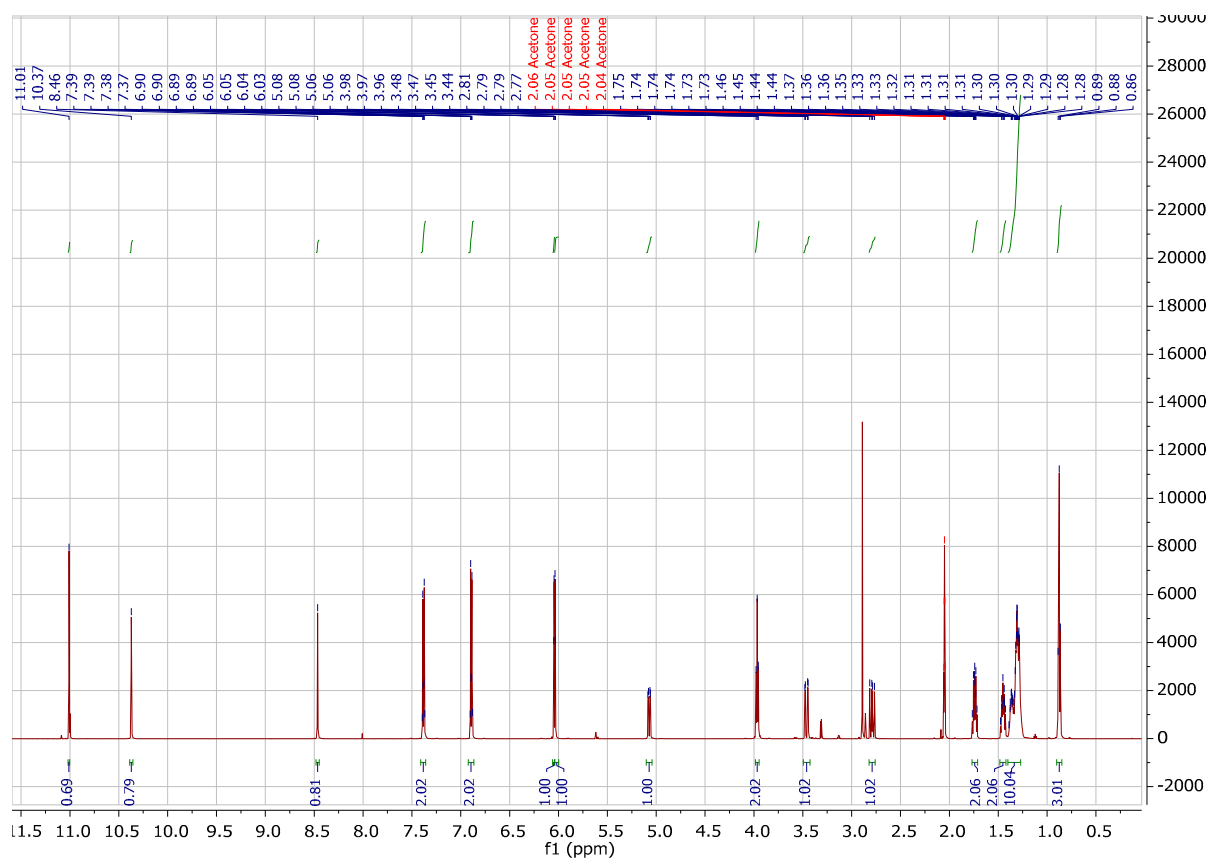

Figure S49.  $^1\text{H}$  NMR (600 MHz, acetone- $d_6$ ) spectrum of 7-O-nonylaringenin oxime (**B7**)

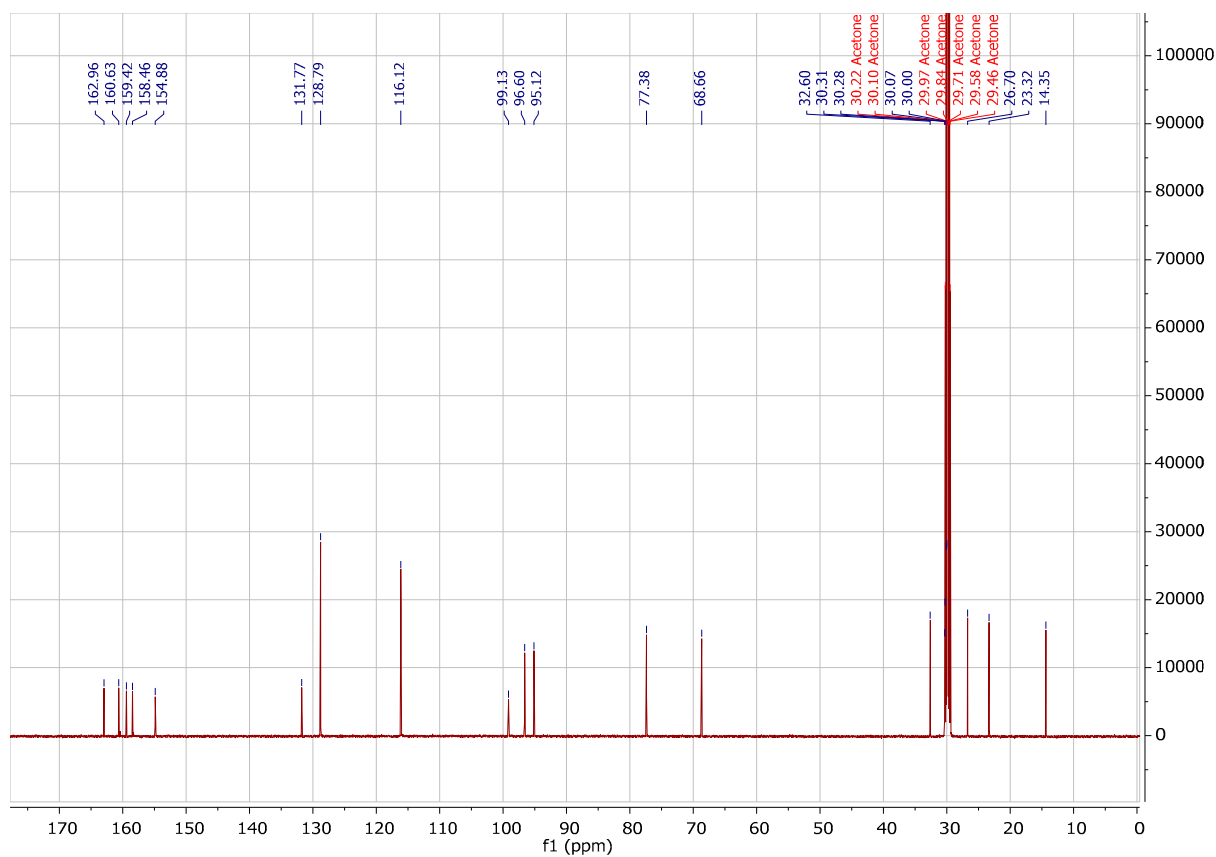

Figure S50. <sup>13</sup>C NMR (150 MHz, acetone-*d*<sub>6</sub>) spectrum of 7-*O*-nonylnaringenin oxime (**B7**)

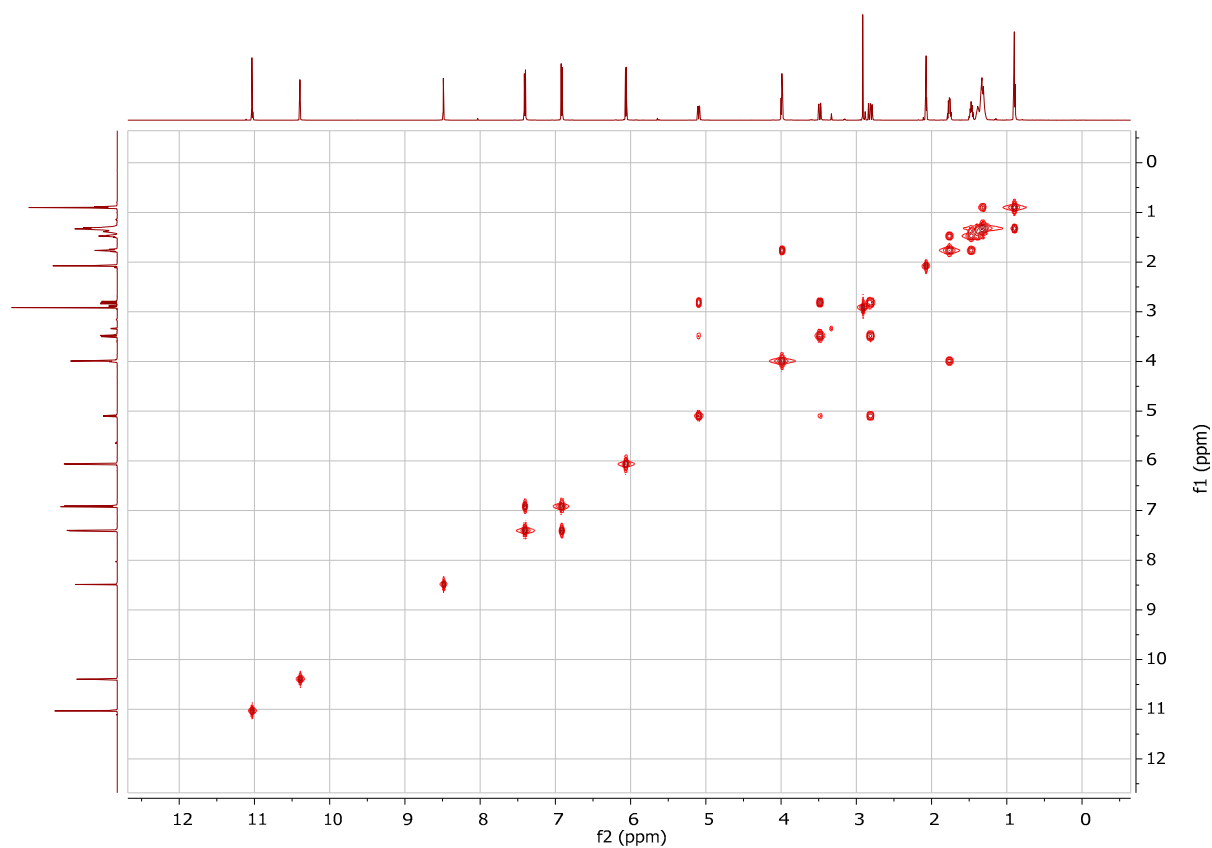

Figure S51. COSY NMR (150 MHz, acetone-*d*<sub>6</sub>) spectrum of 7-*O*-nonylnaringenin oxime (**B7**)



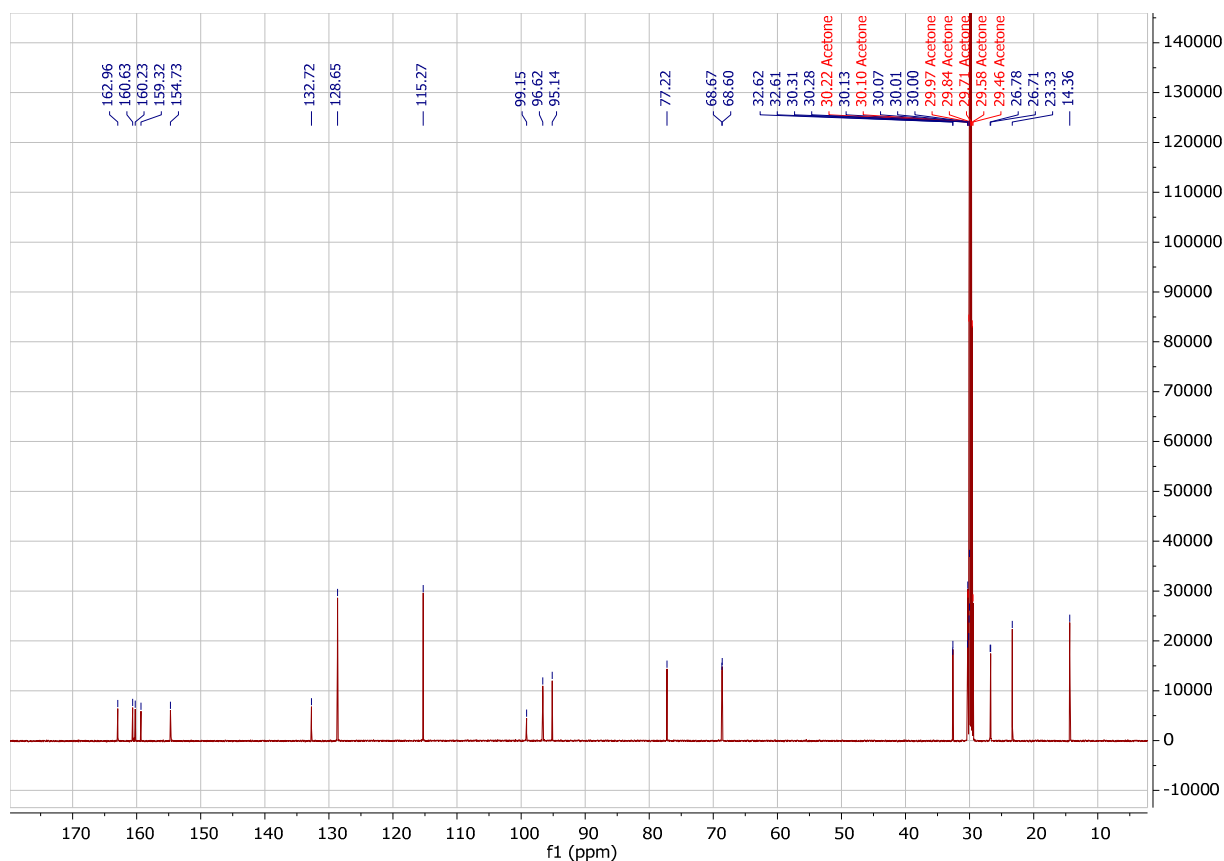

Figure S54.  $^{13}\text{C}$  NMR (150 MHz, acetone- $d_6$ ) spectrum of 7,4'-di-*O*-nonylnaringenin oxime (**B8**)

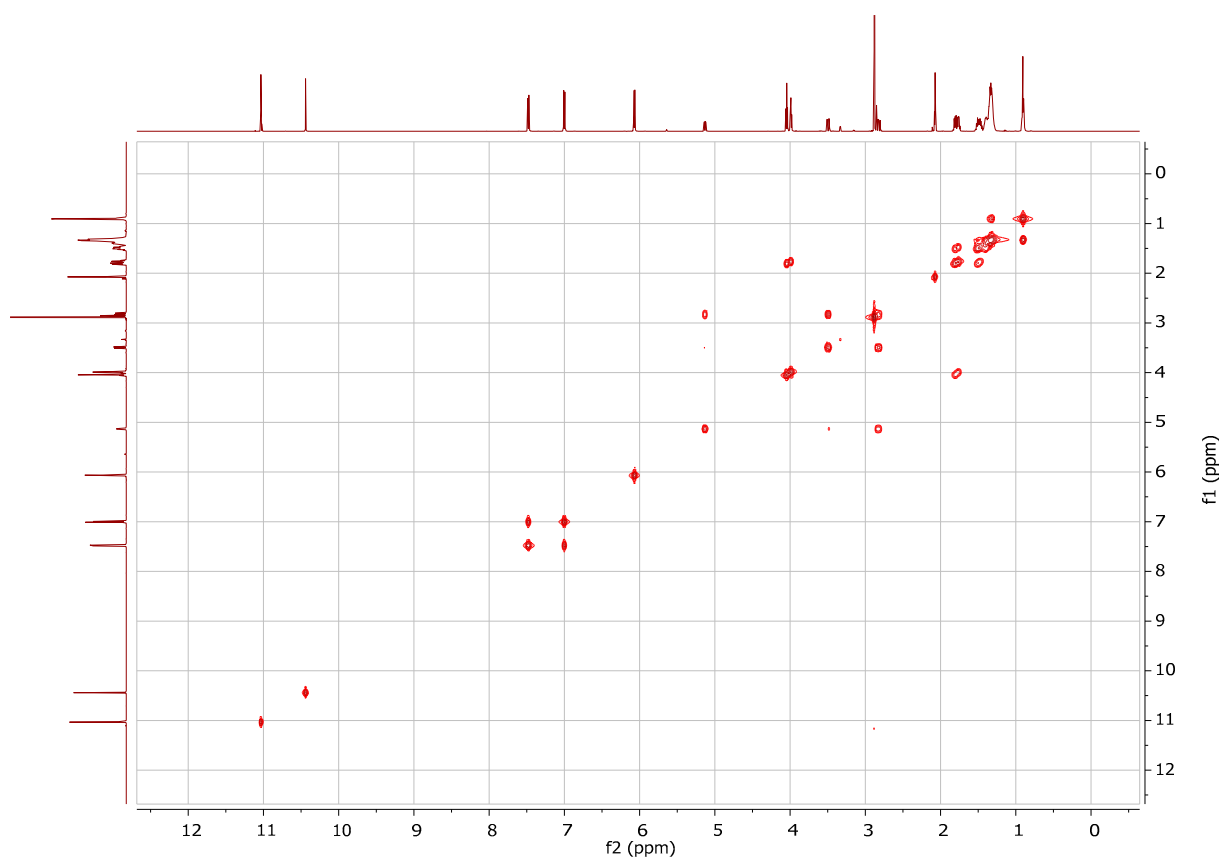

Figure S55. COSY NMR (150 MHz, acetone- $d_6$ ) spectrum of 7,4'-di-*O*-nonylnaringenin oxime (**B8**)

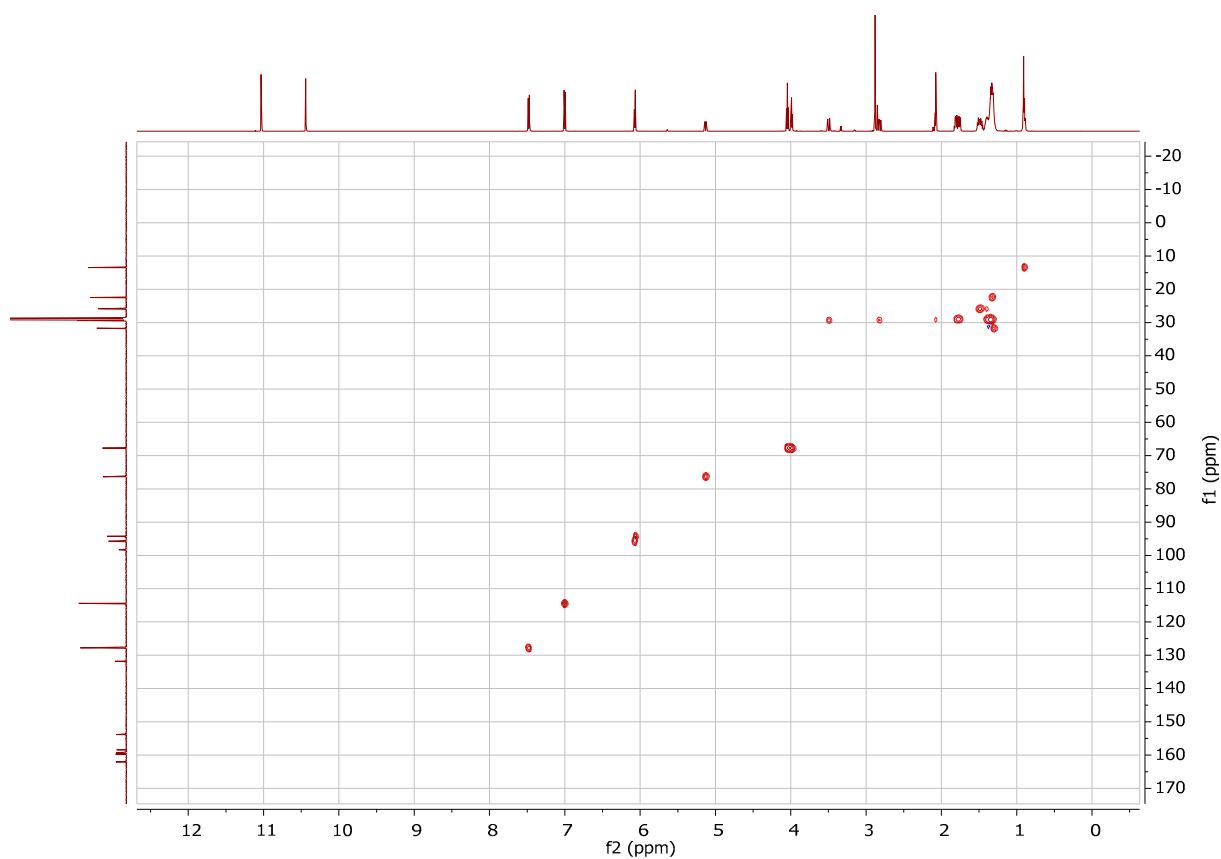

Figure S56. HSQC NMR (150 MHz, acetone- $d_6$ ) spectrum of 7,4'-di-*O*-nonylnaringenin oxime (**B8**)

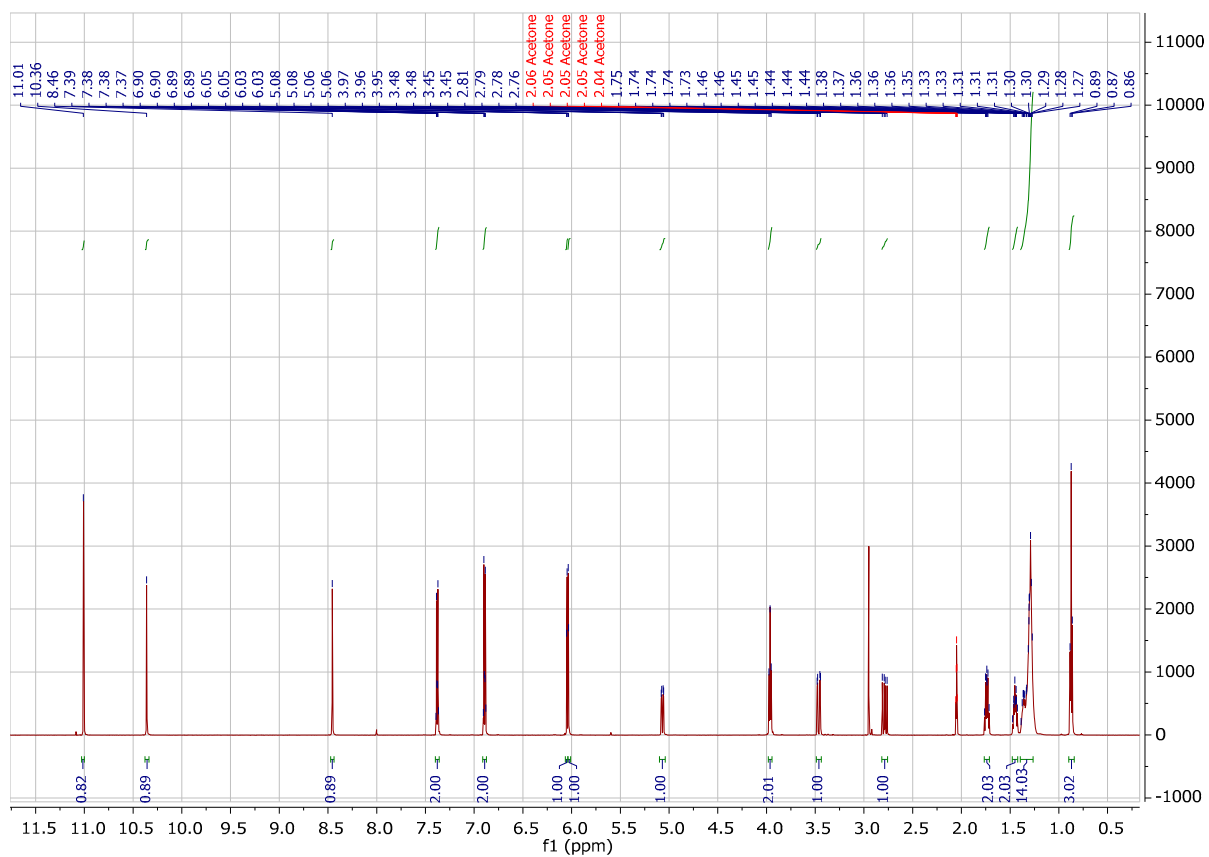

Figure S57.  $^1\text{H}$  NMR (600 MHz, acetone- $d_6$ ) spectrum of 7-*O*-undecylnaringenin oxime (**B9**)

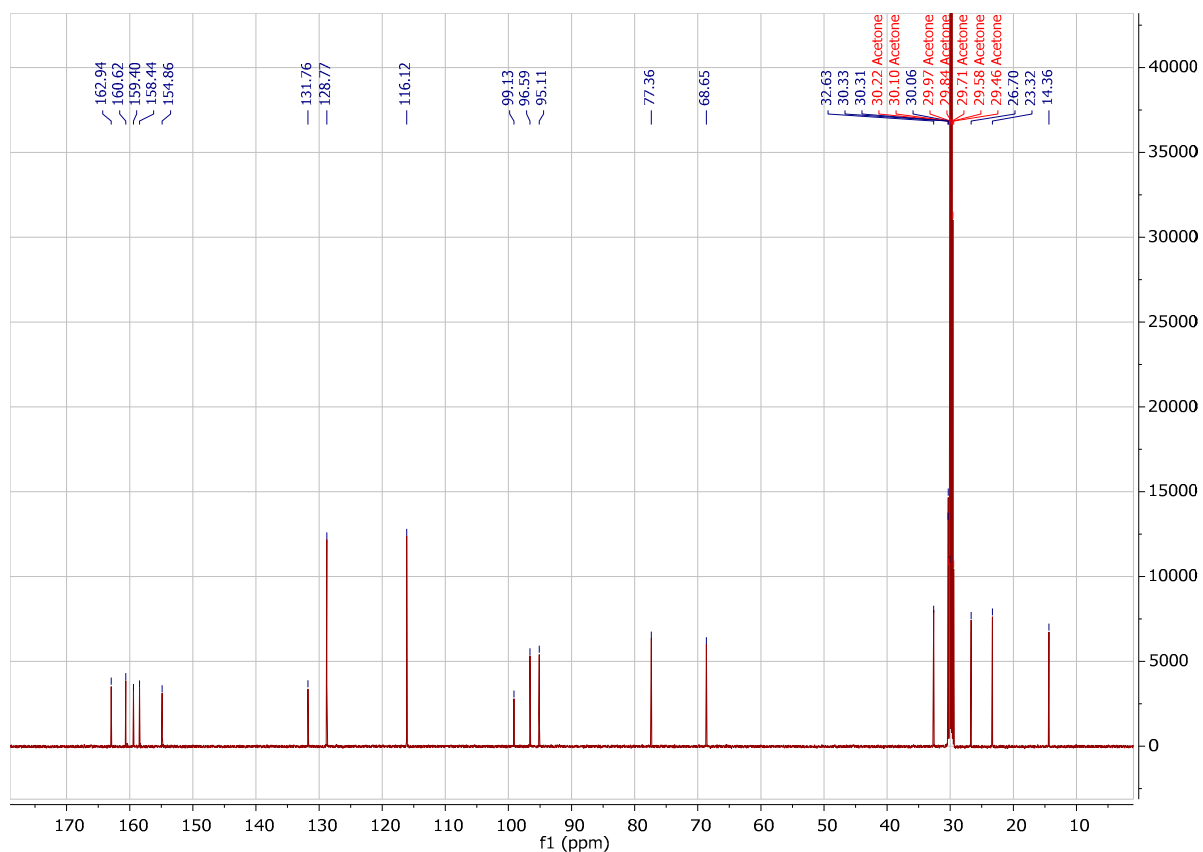

Figure S58.  $^{13}\text{C}$  NMR (150 MHz, acetone- $d_6$ ) spectrum of 7-*O*-undecylraringenin oxime (**B9**)

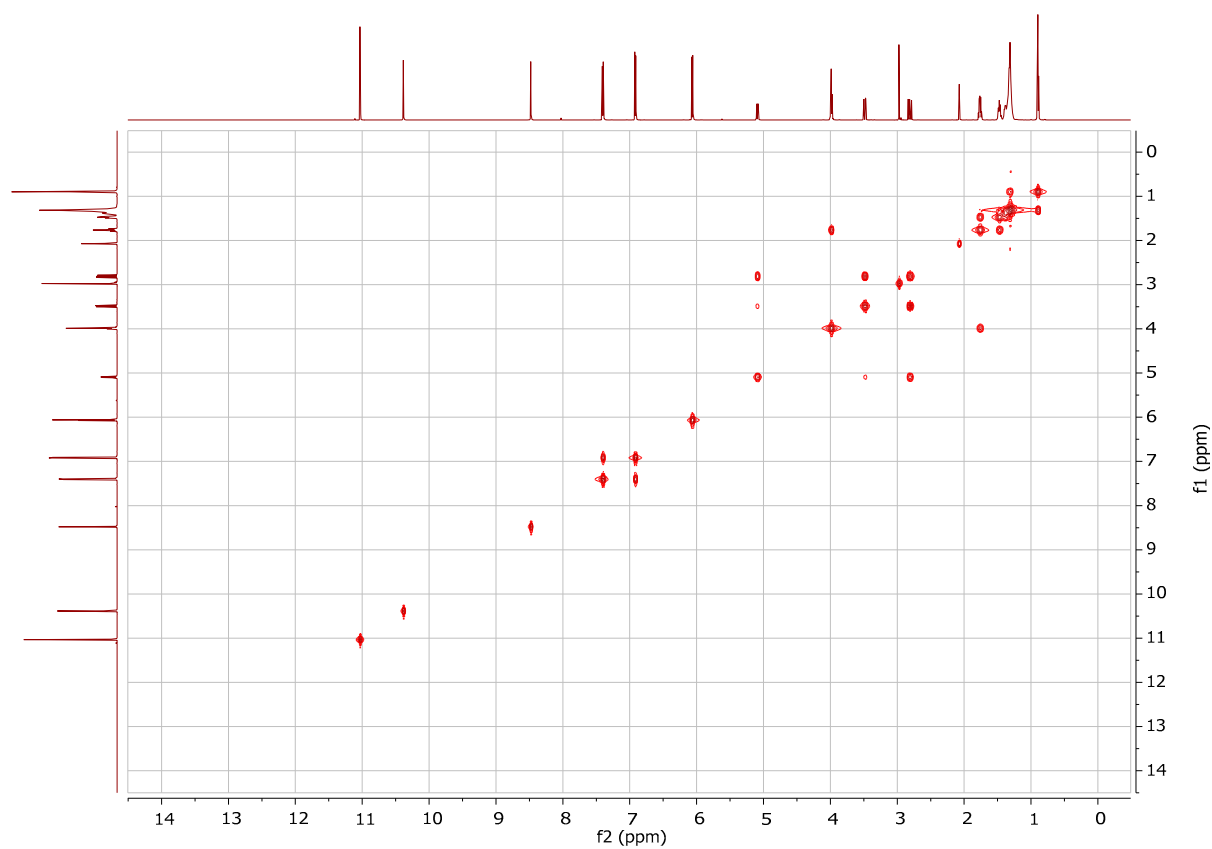

Figure S59. COSY NMR (150 MHz, acetone- $d_6$ ) spectrum of 7-*O*-undecylraringenin oxime (**B9**)



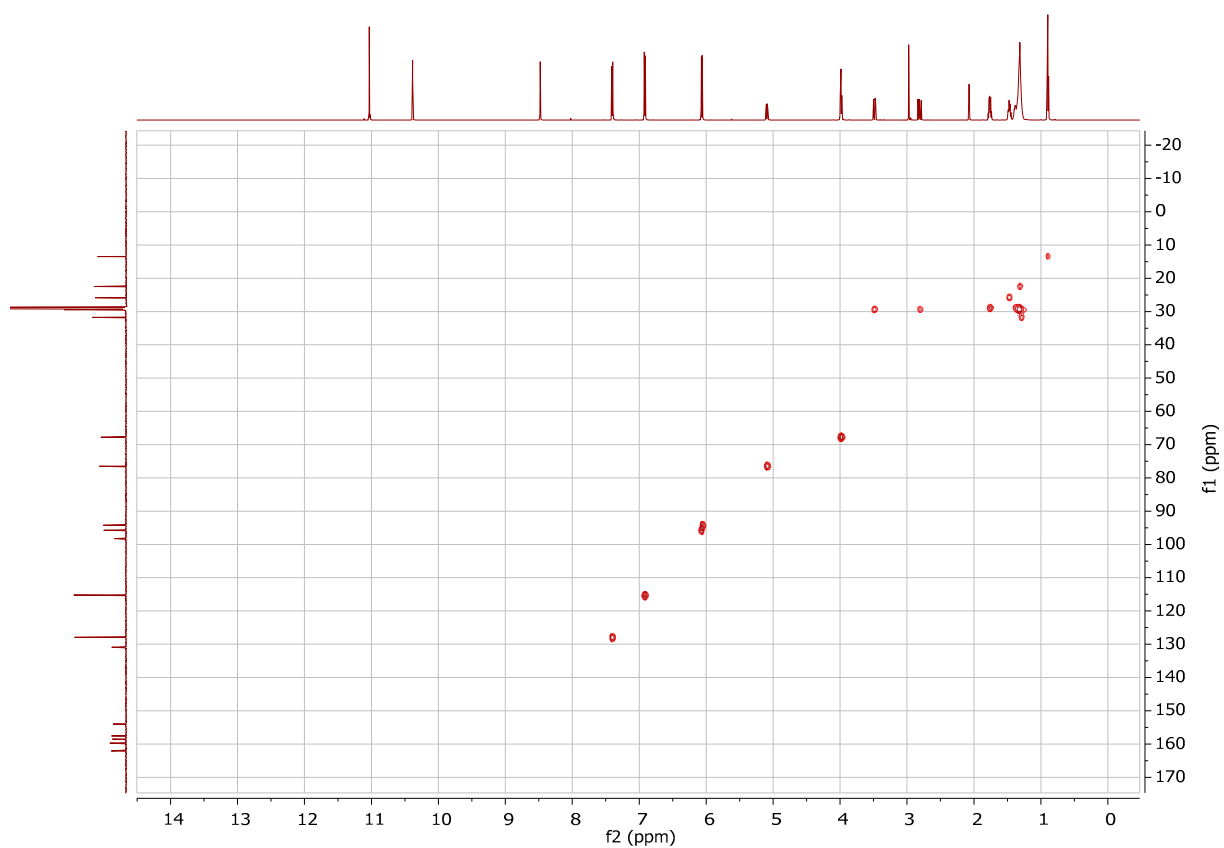

Figure S60. HSQC NMR (150 MHz, acetone- $d_6$ ) spectrum of 7-*O*-undecylharingenin oxime (**B9**)

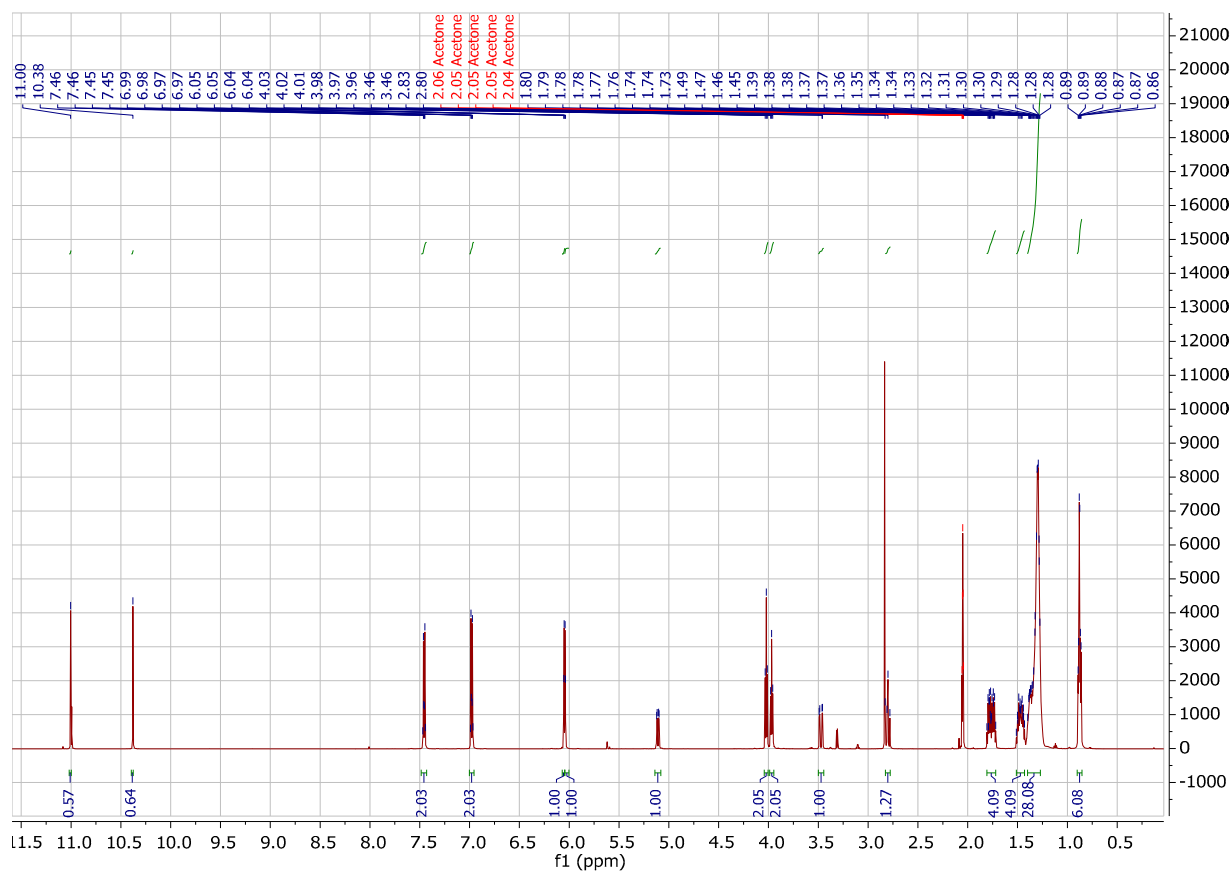

Figure S61.  $^1\text{H}$  NMR (600 MHz, acetone- $d_6$ ) spectrum of 7,4'-di-*O*-undecylharingenin oxime (**B10**)

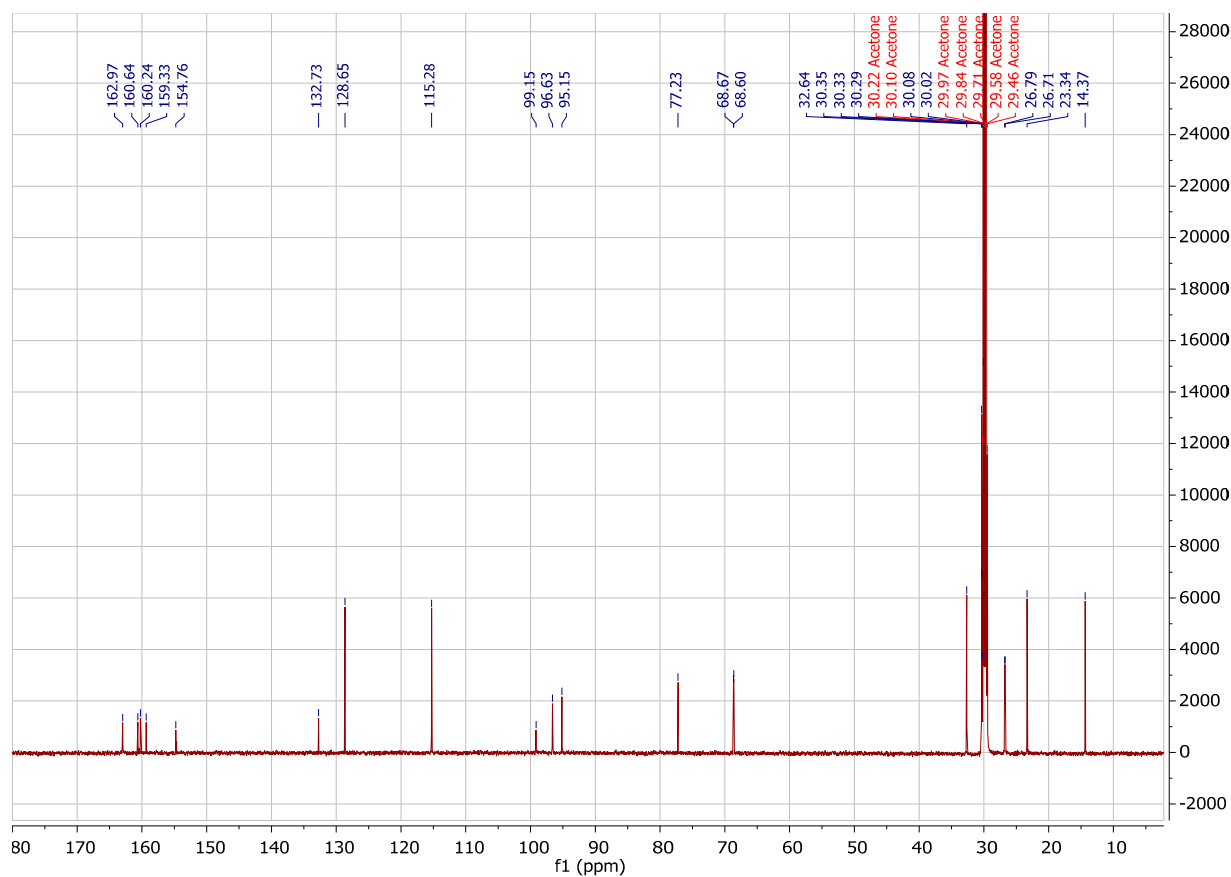

Figure S62.  $^{13}\text{C}$  NMR (150 MHz, acetone- $d_6$ ) spectrum of 7,4'-di-*O*-undecylnaringenin oxime (**B10**)

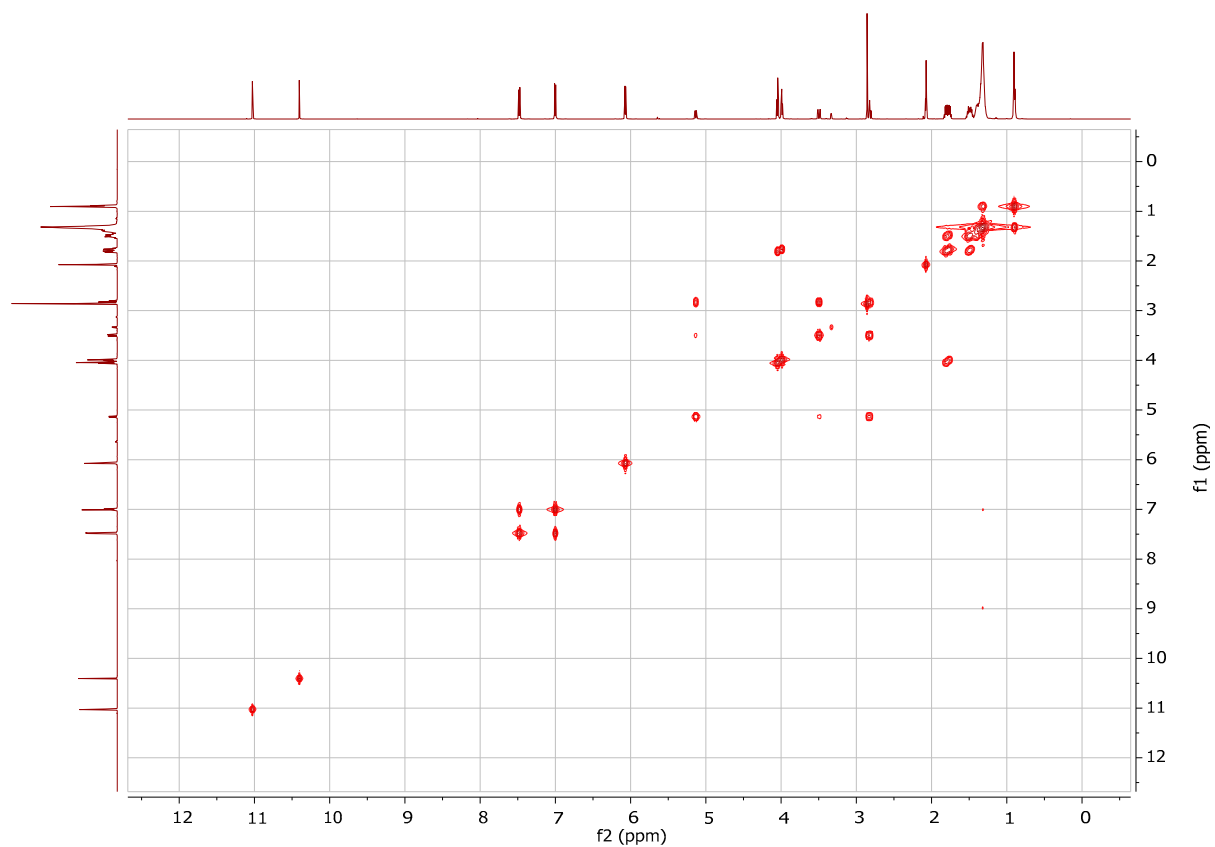

Figure S63. COSY NMR (150 MHz, acetone- $d_6$ ) spectrum of 7,4'-di-*O*-undecylnaringenin oxime (**B10**)

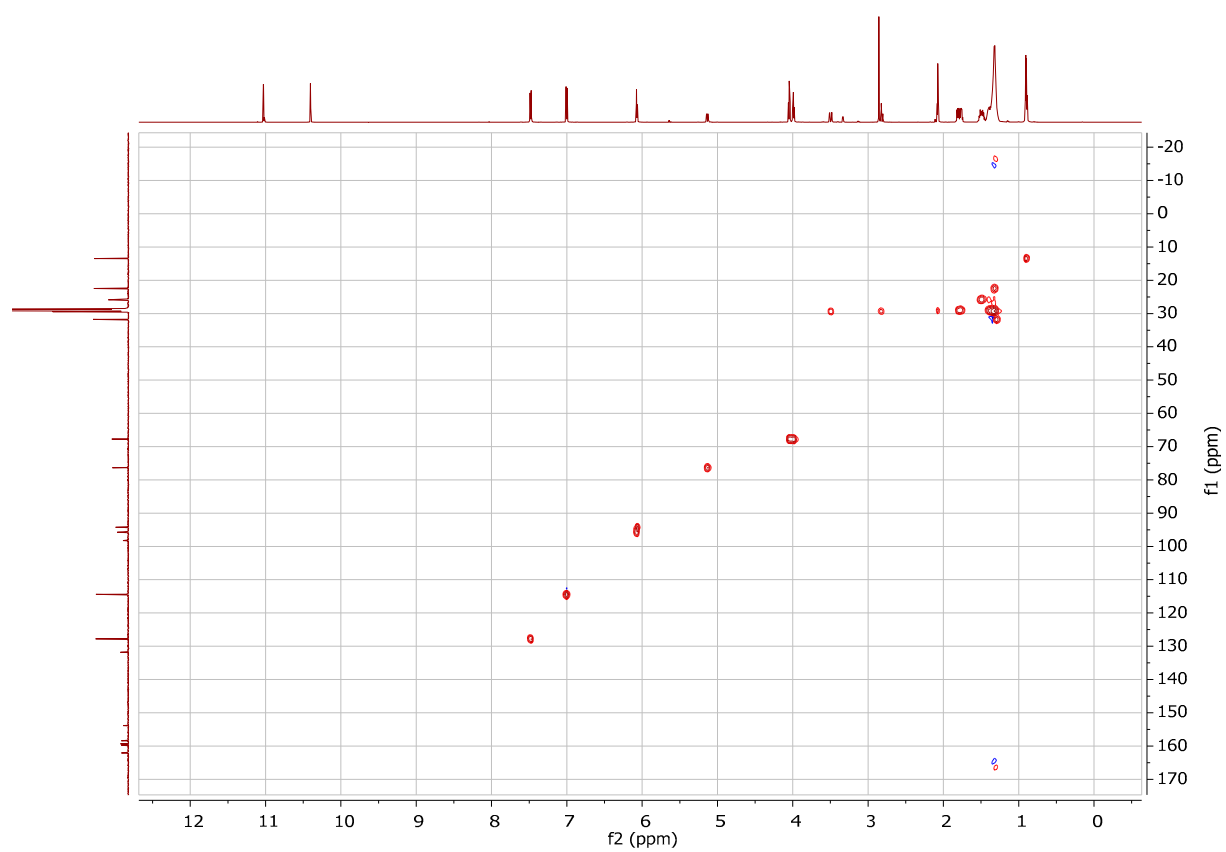

Figure S64. HSQC NMR (150 MHz, acetone- $d_6$ ) spectrum of 7,4'-di-O-undecylnaringenin oxime (**B10**)
